# Modularity of genes involved in local adaptation to climate despite physical linkage

## Authors

Katie E. Lotterhos<sup>1,\*</sup>, Sam Yeaman<sup>2</sup>, Jon Degner<sup>3</sup>, Sally Aitken<sup>3</sup>, Kathryn A. Hodgins<sup>4</sup>

## Affiliations

<sup>1</sup>Department of Marine and Environmental Sciences, Northeastern Marine Science Center, 430 Nahant Rd, Nahant, MA 01908

<sup>2</sup>Department of Biological Sciences, University of Calgary, AB, T2N1N4

<sup>3</sup>Department of Forest and Conservation Sciences, Faculty of Forestry, Vancouver, BC V6T 1Z4  
Canada

<sup>4</sup>School of Biological Sciences, Monash University, Wellington Rd, Clayton VIC 3800

\* Corresponding Author, [k.lotterhos@neu.edu](mailto:k.lotterhos@neu.edu)

**Keywords:** landscape genomics, genetic-environment associations, genome-wide associations (GWAS), conifers, linkage disequilibrium, ion antiporters, auxin biosynthesis, flowering time

**Running title:** Modularity of adaptation despite physical linkage

## 16 Abstract

17 **Background:** Linkage among genes experiencing different selection pressures can make  
18 natural selection less efficient. Theory predicts that when local adaptation is driven by complex  
19 and non-covarying stresses, increased linkage is favoured for alleles with similar pleiotropic  
20 effects, with increased recombination favoured among alleles with contrasting pleiotropic  
21 effects. Here, we introduce a framework to test these predictions with a co-association network  
22 analysis, which clusters loci based on differing associations. We use this framework to study the  
23 genetic architecture of local adaptation to climate in lodgepole pine (*Pinus contorta*), based on  
24 associations with environments.

25 **Results:** We identified many clusters of candidate genes and SNPs associated with distinct  
26 environments (aspects of aridity, freezing, etc.), and discovered low recombination rates among  
27 some candidate genes in different clusters. Only a few genes contained SNPs with effects on  
28 more than one distinct aspect of climate. There was limited correspondence between  
29 co-association networks and gene regulatory networks. We further showed how associations  
30 with environmental principal components can lead to misinterpretation. Finally, simulations  
31 illustrated both benefits and caveats of co-association networks.

32 **Conclusions:** Our results supported the prediction that different selection pressures favored the  
33 evolution of distinct groups of genes, each associating with a different aspect of climate. But our  
34 results went against the prediction that loci experiencing different sources of selection would  
35 have high recombination among them. These results give new insight into evolutionary debates  
36 about the extent of modularity, pleiotropy, and linkage in the evolution of genetic architectures.

## 37 Background

38 Pleiotropy and linkage are fundamental aspects of genetic architecture [1]. Pleiotropy is when a  
39 gene has effects on multiple distinct traits. Pleiotropy may hinder the rate of adaptation by  
40 increasing the likelihood that genetic changes have a deleterious effect on at least one trait  
41 [2, 3]. Similarly, linkage among genes experiencing different kinds of selection can facilitate or  
42 hinder adaptation [4–6]. Despite progress in understanding the underlying pleiotropic nature of  
43 phenotypes and the influence of pleiotropy on the rate of adaptation to specific conditions [7],  
44 we have an incomplete understanding of the extent and magnitude of linkage and pleiotropy in  
45 the local adaptation of natural populations to the landscapes and environments in which they  
46 are found.

47 Here, we aim to characterize the genetic architecture of adaptation to the environment, including  
48 the number of separate components of the environment in which a gene affects fitness (a form  
49 of “selectional pleiotropy,” Table 1)[8]. Genetic architecture is an encompassing term used to  
50 describe the pattern of genetic features that build and control a trait , and includes statements  
51 about the number of genes or alleles involved, their arrangement on chromosomes, the  
52 distribution of their effects, and patterns of pleiotropy (Table 1). We can measure many  
53 parameters to characterize environments (e.g., temperature, latitude, precipitation), but the  
54 variables we define may not correspond to the environmental factors that matter for an  
55 organism’s fitness. A major hurdle in understanding how environments shape fitness is defining  
56 the environment based on factors that drive selection and local adaptation, and not by the  
57 intrinsic attributes of the organism or by the environmental variables we happen to measure.

58 In local adaptation to climate, an allele that has different effects on fitness at different extremes  
59 of an environmental variable (e.g., positive effects on fitness in cold environments and negative

60 effects in warm environments, often called “antagonistic pleiotropy”, Table 1[9]) will evolve to  
61 produce a clinal relationship between the allele frequency and that environmental factor [10–15].  
62 While associations between allele frequencies and environmental factors have been well  
63 characterized across many taxa [16], whether genes affect fitness in multiple distinct aspects of  
64 the environment, which we call “environmental pleiotropy” (e.g., has effects on fitness in both  
65 cold and dry environments, Table 1), has not been well characterized [17]. This is because of  
66 conceptual issues that arise from defining environments along the univariate axes that we  
67 measure. For example, “cold” and “dry” might be a single selective optimum (“cold-dry”) to  
68 which a gene adapts [7], but these two axes are typically analyzed separately. Moreover, climate  
69 variables such as temperature and precipitation are highly correlated across landscapes, and  
70 this correlation structure makes inferring pleiotropy from signals of selection to climate difficult.  
71 Indeed, in their study of climate adaptation in *Arabidopsis*, Hancock et al. [17] noticed that  
72 candidate loci showed signals of selection in multiple environmental variables, potentially  
73 indicating pleiotropic effects. However, they also found that a substantial proportion of this  
74 overlap was due to correlations among climate variables on the landscape, and as a result they  
75 were unable to fully describe pleiotropic effects.

76 Because of the conceptual issues described above, certain aspects of the genetic architecture  
77 of adaptation to landscapes have not been well characterized, particularly the patterns of  
78 linkage among genes adapting to distinct environmental factors, and the degree of pleiotropic  
79 effects of genes on fitness in distinct environments. These aspects of genetic architecture are  
80 important to characterize in order to test the theoretical predictions described below, and to  
81 inform the considerable debate about whether organisms have a modular organization of gene



82 effects on phenotypes or fitness components, versus universal effects of genes on all  
83 phenotypes or fitness components (Figure 1A, compare left to right column) [18–24].

84 Modular genetic architectures are characterized by extensive pleiotropic effects among  
85 elements within a module, and a suppression of pleiotropic effects between different modules  
86 [25]. Note that modularity in this study refers to similarity in the effects of loci on fitness, and not  
87 necessarily to the physical location of loci on chromosomes or to participation in the same gene  
88 regulatory network. Modular genetic architectures are predicted to be favored when genomes  
89 face complex spatial and temporal environments [26] or when multiple traits are under a  
90 combination of directional and stabilizing selection (because modularity allows adaptation to  
91 take place in one trait without undoing the adaptation achieved by another trait) [25, 27].

92 Adaptation to climate on a landscape fits these criteria because environmental variation among  
93 populations is complex - with multiple abiotic and biotic challenges occurring at different spatial  
94 scales - and traits are thought to be under stabilizing selection within populations but directional  
95 selection among populations [28].

96 Clusters of physically linked loci subject to the same selective environment, as well as a lack of  
97 physical linkage among loci subject to different selection pressures, are expected based on  
98 theory. When mutations are subject to the same selection pressure, recombination can bring  
99 variants with similar effects together and allow evolution to proceed faster [29]. Clusters of  
100 adaptive loci can also arise through genomic rearrangements that bring existing mutations  
101 together [30], or because new causal mutations linked to adaptive alleles have an increased  
102 establishment probability [31]. Similarly, clusters of locally adaptive loci are expected to evolve  
103 in regions of low recombination, such as inversions, because of the reduced gene flow these  
104 regions experience [32, 33]. In general, these linked clusters of adaptive loci are favored over

105 evolutionary time because low recombination rates increase the rate at which they are inherited  
106 together. Conversely, selection will also act to disfavour linkage and increase recombination  
107 rates between genes adapting to different selection pressures [34–36]. Thus, genes adapting to  
108 different selection pressures would be unlikely to be physically linked or to have low  
109 recombination rates between them. In practice, issues can arise in inference because physical  
110 linkage will cause correlated responses to selection in neutral loci flanking a causal locus. Large  
111 regions of the genome can share similar patterns of association to a given environmental factor,  
112 such that many loci within a given candidate region are probably not causally responding to  
113 selection. Conversely, if linked genes are associated with completely different aspects of the  
114 selective environment, this is unlikely to arise by chance.

115 In summary, current analytical techniques have given limited insight into the genetic  
116 architectures of adaptation to environmental variation across natural landscapes. Characterizing  
117 the different aspects of the environment that act on genomes is difficult because measured  
118 variables are univariate and may not be representative of selection from the perspective of the  
119 organism, and because of spatial correlations among environmental variables. Even when many  
120 variables are summarized with ordination such as principal components, the axes that explain  
121 the most variation in physical environment don't necessarily correspond to the axes that cause  
122 selection because the components are orthogonal [37]. Furthermore, the statistical methods  
123 widely used for inferring adaptation to climate are also univariate in the sense that they test for  
124 significant correlations between the frequency of a single allele and a single environmental  
125 variable [e.g., 38, 39, 40]. While some multivariate regression methods like redundancy analysis  
126 have been used to understand how multiple environmental factors shape genetic structure [41,

127 42], they still rely on ordination and have not been used to identify distinct evolutionary modules  
128 of loci.

129 Here, we aim fill this gap by presenting a framework for characterizing the genetic architecture  
130 of adaptation to the environment, through the joint inference of modules of loci that associate  
131 with distinct environmental factors that we call “co-association modules” (Table 1, Figure 1), as  
132 well as the distinct factors of the environment to which they associate. Using this framework, we  
133 can characterize some aspects of genetic architecture, including modularity and linkage, that  
134 have not been well studied in the adaptation of genomes to environments.

135 This framework is illustrated in Figure 1 for four hypothetical genes adapted to two distinct  
136 aspects of climate (freezing and aridity). In this figure we compare the patterns expected for (i) a  
137 modular architecture (left column, where pleiotropic fitness effects of a gene are limited to one  
138 particular climatic factor) to (ii) a highly environmentally pleiotropic architecture (right column,  
139 where genes have pleiotropic effects on adaptation to distinct climatic factors). Candidate SNPs  
140 are first identified by the significance of the univariate associations between allele frequency  
141 and the measured environmental variables, evaluated against what would be expected by  
142 neutrality. Then, hierarchical clustering of candidate-SNP allele associations with environments  
143 is used to identify co-association modules (Figure 1B) [43–45]. These modules can be  
144 visualized with a co-association network analysis, which identifies groups of loci that may covary  
145 with one environmental variable but covary in different ways with another, revealing patterns that  
146 are not evident through univariate analysis (Figure 1C). By defining the distinct aspects of the  
147 selectional environment (Table 1) for each module through their environmental associations, we  
148 can infer pleiotropic effects of genes through the associations their SNPs have with distinct  
149 selective environmental factors (Figure 1D). In this approach, the genetic effects of loci on

150 different traits under selection are unknown, and we assume that each aspect of the multivariate  
151 environment selects for a trait or suite of traits that can be inferred by connecting candidate loci  
152 directly to the environmental factors that select for particular allelic combinations.

153 We apply this new approach to characterize the genetic architecture of local adaptation to  
154 climate in lodgepole pine (*Pinus contorta*) using a previously published exome capture dataset  
155 [46–48] from trees that inhabit a wide range of environments across their range, including  
156 freezing temperatures, precipitation, and aridity [49–52]. Lodgepole pine is a coniferous species  
157 inhabiting a wide range of environments in northwestern North America and exhibits isolation by  
158 distance population structure across the range [46]. Previous work based on reciprocal  
159 transplants and common garden experiments has shown extensive local adaptation [46, 53, 54].  
160 We recently used this dataset to study convergent adaptation to freezing between lodgepole  
161 pine and the interior spruce complex (*Picea glauca* x *Picea engelmannii*) [46–48]. However, the  
162 comparative approach was limited to discovering parallel patterns between species, and did not  
163 examine selective factors unique to one species. As in most other systems, the genomic  
164 architecture in pine underlying local adaptation to the multivariate environment has not been  
165 well characterized, and our reanalysis yields several new biological insights overlooked by the  
166 comparative approach.

167 We evaluated the benefits and caveats of this new framework by comparing it with other  
168 multivariate approaches (based on principal components) and by evaluating it with simulated  
169 data. The evaluation with simulations yielded several important insights, including the  
170 importance of using strict criteria to exclude loci with false positive associations with  
171 environments. Thus, a key starting point for inferring co-association modules is a good set of  
172 candidate SNPs for adaptation. We developed this candidate set by first identifying top

173 candidate genes for local adaptation (from a previously published set of genes that contained  
174 more outliers for genotype-environment associations and genotype-phenotype associations  
175 than expected by chance, [46]). We then identified top candidate SNPs within these top  
176 candidate genes as those whose allele frequencies were associated with at least one  
177 environmental variable above that expected by neutrality (using a criterion that excluded false  
178 positives in the simulated data described below). To this set of top candidate SNPs, we applied  
179 the framework outlined in Figure 1 to characterize environmental modularity and linkage of the  
180 genetic architecture. The power of our dataset comes from including a large number of  
181 populations inhabiting diverse environments (>250), the accurate characterization of climate for  
182 each individual with 22 environmental variables, a high-quality exome capture dataset  
183 representing more than 500,000 single-nucleotide polymorphisms (SNPs) in ~29,000 genes  
184 [46–48], a mapping population that allows us to study recombination rates among genes, and  
185 an outgroup species that allowed us to determine the derived allele for most candidate SNPs.  
186 When such data is available, we find that this framework is useful for characterizing the  
187 environmental modularity and linkage relationships among candidate genes for local adaptation  
188 to multivariate environments.

## 189 Results

### 190 *Top candidate genes and top candidate SNPs*

191 The study of environmental pleiotropy and modularity is relevant only to loci under selection. In  
192 this study we identified a SNP as a top candidate based on whether (i) it was located within a  
193 top-candidate gene, and (ii) its allele frequency was associated with at least one environmental  
194 variable above and beyond what may be expected for neutrality. Our “top candidate” approach  
195 identified a total of 117 candidate genes out of a total of 29,920 genes. These contigs contained

196 801 top-candidate SNPs (out of 585,270 exome SNPs) that were strongly associated with at  
197 least one environmental variable and were likely either causal or tightly linked to a causal locus.  
198 This set of top candidate SNPs was enriched for  $X^T X$  outliers (Supplemental Figure 1;  $X^T X$  is an  
199 analog of  $F_{ST}$  that measures differentiation in allele frequencies across populations). To  
200 elucidate patterns of multivariate association, we applied the framework described in Figure 1 to  
201 these 801 top candidate SNPs.

### 202 *Co-association modules*

203 Hierarchical clustering and co-association network analysis of top candidate SNPs revealed a  
204 large number of co-association modules, each of which contains SNPs from one or more genes.  
205 Each co-association module is represented by one or more top candidate SNPs (represented by  
206 nodes) that are connected by edges. The edges are drawn between two SNPs if they have  
207 similar associations with the environment below a distance threshold. The distance threshold  
208 was determined by simulation as a number that enriched connections among selected loci  
209 adapting to the same environmental variable, and also decreased the number of connections to  
210 false positive loci (see *Results: Simulated datasets*).

211 For the purposes of illustration, we classified SNPs into 4 main groups, each with several  
212 co-association modules, according to the kinds of environmental variables they were most  
213 strongly associated with: Aridity, Freezing, Geography, and an assorted group we bin as “Multi”  
214 (Figure 2A, B). Note that while we could have chosen a different number of groups, this would  
215 not have changed the underlying clustering of the SNPs revealed by co-association networks  
216 that is relevant to modularity (Figure 2B-F). This division of data into groups was necessary to  
217 produce coherent visual network plots and to make data analyses more computationally efficient  
218 (we found when there were more than ~20,000 edges in the data, computation and plotting of

219 the network were not feasible with the package). Note that SNPs in different groups are more  
220 dissimilar to SNPs in other groups than to those in the same group (based on the threshold we  
221 used to determine edges) and would not be connected by edges in a co-association module.  
222 Interestingly, this clustering by association signatures does not closely parallel the correlation  
223 structure among environmental variables themselves. For example, continentality (TD),  
224 degree-days below 0 (DD\_0), and latitude (LAT) are all relatively strongly correlated ( $> 0.5$ ), but  
225 the “Freezing” SNPs are associated with continentality and degree-days below 0, but not  
226 latitude (Figure 2A, 2B).

227 The co-association modules are shown in Figures 2C-F. Each connected network of SNPs can  
228 be considered a group of loci that shows associations with a distinct environmental factor. The  
229 “Multi” group stands for multiple environments because these SNPs showed associations with  
230 19 to 21 of the 22 environmental variables. This group consisted of 60 top candidate SNPs  
231 across just 3 genes, and undirected graph networks revealed 2 co-association modules within  
232 this group (Figure 2C, Supplementary Figure 2). The “Aridity” group consisted of 282 SNPs  
233 across 28 genes and showed associations with climate moisture deficit, annual heat:moisture  
234 index, mean summer precipitation, and temperature variables excluding those that were  
235 frost-related (Figure 2B). All these SNPs were very similar in their patterns of association and  
236 grouped into a single co-association module (Figure 2D, Supplementary Figure 3). The  
237 “Freezing” group consisted of 176 SNPs across 21 genes and showed associations with  
238 freezing variables including number of degree-days below 0°C, mean coldest month  
239 temperature, and variables related to frost occurrence (Figure 2B). SNPs from eight of the  
240 genes in this group formed a single module (genes #35-42), with the remaining SNPs mainly  
241 clustering by gene (Figure 2E, Supplementary Figure 4). The final group, “Geography,” consisted  
242 of 282 SNPs across 28 genes that showed consistent associations with the geographical

243 variables elevation and longitude, but variable associations with other climate variables (Figure  
244 2B). This group consisted of several co-association modules containing 1 to 9 genes (Figure 2F,  
245 Supplementary Figure 6). Network analysis using population-structure-corrected associations  
246 between allele frequency and the environmental variables resulted in broadly similar patterns,  
247 although the magnitude of the correlations was reduced (Supplemental Figure 6).

248 The pleiotropy barplot is visualized in Figure 2G, where each gene is listed along the x-axis, the  
249 bar color indicates the co-association module, and the bar height indicates the number of SNPs  
250 clustering with that module. If each co-association module associates with a distinct aspect of  
251 the multivariate environment, then genes whose SNPs associate with different co-association  
252 modules (e.g., genes with different colors in their bars in Figure 2G) might be considered to be  
253 environmentally pleiotropic. However, conceptual issues remain in inferring the extent of  
254 pleiotropy, because co-association modules within the Geography group, for instance, will be  
255 more similar to each other in their associations with environments than between a module in the  
256 Geography group and a module in the Multi group. For this reason, we are only inferring that our  
257 results are evidence of environmental pleiotropy when genes have SNPs in at least 2 of the 4  
258 major groups in the data. For instance, gene #1, for which the majority of SNPs cluster with the  
259 Multi group, also has 8 SNPs that cluster with the Freezing group (although they are not located  
260 in co-association modules with any genes defined by Freezing). In the Aridity group, gene #11  
261 has three SNPs that also cluster with the Geography group (although they are not located in  
262 co-association modules with any genes defined by Geography). In the Freezing group, some  
263 genes located within the same co-association module (#35-40) also have SNPs that cluster with  
264 another module in the Geography group (with genes #75-76; these are not physically linked to  
265 genes #35-37, see below). Whether or not these are “true” instances of environmental  
266 pleiotropy remains to be determined by experiments. For the most part, however, the large



267 majority of SNPs located within genes are in the same co-association module, or in modules  
268 located within one of the four main groups, so environmental pleiotropy at the gene-level  
269 appears to be generally quite limited.

#### 270 *Statistical and physical linkage disequilibrium*

271 To determine if grouping of SNPs into co-association modules corresponded to associations  
272 driven by statistical associations among genes measured by linkage disequilibrium (LD), we  
273 calculated mean LD among all SNPs in the top candidate genes (as the correlation in allele  
274 frequencies). We found that the co-association modules captured patterns of LD among the  
275 genes through their common associations with environmental variables (Supplementary Figure  
276 S7). There was higher than average LD within the co-association modules of the Multi, Aridity,  
277 and Freezing groups, and very low LD between the Aridity group and the other groups  
278 (Supplementary Figure S7). The LD among the other three groups (Multi, Freezing, and  
279 Geography) was small, but higher with each other than with Aridity. Thus, the co-association  
280 clustering corresponded to what we would expect based on LD among genes, with the  
281 important additional benefit of linking LD clusters to likely environmental drivers of selection.

282 The high LD observed within the four main climate modules could arise via selection by the  
283 same factor of the multivariate environment, or via physical linkage on the chromosome, or  
284 both. We used a mapping population to disentangle these two hypotheses, by calculating  
285 recombination rates among the top candidate genes (see *Methods: Recombination rates*). Of  
286 the 117 top candidate genes, 66 had SNPs that were represented in our mapping population.

287 The recombination data revealed that all the genes in the Aridity group have strong LD and are  
288 physically linked (Figure 3). Within the other three groups, we found physical proximity for only a  
289 few genes, typically within the same co-association module (but note that our mapping analysis

290 does not have high power to infer recombination rate when loci are physically unlinked; see  
291 *Methods*). For example, a few co-association modules in the Geography group (comprised of  
292 genes #53-54, #60-63, or #75-76) had very low recombination rates among them. Of the three  
293 genes forming the largest co-association module in the Freezing Group that was represented in  
294 our mapping panel (#35-37), two were physically linked.

295 Strikingly, low recombination rates were estimated between some genes belonging to different  
296 co-association modules across the four main groups, even though there was little LD among  
297 SNPs in these genes (Figure 3). This included a block of loci with low recombination comprised  
298 of genes from all 4 groups: 8 genes from the Aridity co-association module, 1 gene from the  
299 large module in the Multi group, 2 genes from different co-association modules in the Freezing  
300 group, and 7 genes from different co-association modules in the Geography group (upper  
301 diagonal of Figure 3, see Supplementary Figure S8 for a reorganization of the recombination  
302 data and more intuitive visualization).

### 303 *Comparison to conclusions based on principal components of environments*

304 We compared the results from the co-association network analysis to associations with principal  
305 components (PC) of the environmental variables. Briefly, all environmental variables were input  
306 into a PC analysis, and associations between allele frequencies and PC axes were analyzed.  
307 We used the same criteria ( $\log_{10} BF > 2$  in bayenv2) to determine if a locus was a significant  
308 outlier and compared (i) overlap with top candidate SNPs based on outliers from univariate  
309 associations with environments, and (ii) interpretation of the selective environment based on  
310 loadings of environments to PC axes. The first three PC axes explained 44% (PC1), 22% (PC2),  
311 and 15% (PC3) of the variance in environments (80% total). Loadings of environment variables  
312 onto PC axes are shown in Supplementary Figure S9. A large proportion of top candidate SNPs

313 in our study would not have been found if we had first done a PCA on the environments and  
314 then looked for outliers along PC axes: overall, 80% of the geography SNPs, 75% of the  
315 Freezing SNPs, 20% of the Aridity SNPs, and 10% of the Multi SNPs were *not* outliers along the  
316 first 10 PC axes and would have been missed.

317 Next, we evaluated whether interpretation of selective environments based on PCs was  
318 consistent with that based on associations with individual environmental factors. Some of the  
319 temperature and frost variables (MAT: mean annual temperature, EMT: extreme minimum  
320 temperature, DD0: degree days below 0C, DD5: degree days above 5C, bFFP: begin frost-free  
321 period, FFP: frost free period, eFFP: end frost free period, labels in Figure 2A) had the highest  
322 loadings for PC1 (Supplementary Figure S9). Almost all of the SNPs in the Multi group (90%)  
323 and 19% of SNPs in the Freezing group were outliers along this axis (Supplementary Figure 10,  
324 note green outliers along x-axis from Multi group; less than 2% of candidate SNPs in the other  
325 groups were outliers). For PC1, interpretation of the selective environment (e.g., MAT, DD0,  
326 FFP, eFFP, DD5) is somewhat consistent with the co-association network analysis (both Multi  
327 SNPs and Freezing SNPs show associations with all these variables, Figure 2B). However, the  
328 Multi SNPs and Freezing SNPs had strong associations with other variables (e.g., Multi SNPs  
329 showed strong associations with Latitude and Freezing SNPs showed strong associations with  
330 longitude, Figure 2B) that did not load strongly onto this axis, and would have been missed in an  
331 interpretation based on associations with principal components.

332 Many precipitation and aridity variables loaded strongly onto PC2, including mean annual  
333 precipitation, annual heat:moisture index, climate moisture deficit, and precipitation as snow  
334 (Supplementary Figure 9). However, few top candidate SNPs were outliers along the PC2 axis:

335 only 13% of Freezing SNPs, 10% of Aridity SNPs, and less than 3% of Multi or Geography  
336 SNPs were outliers (Supplementary Figure 10A, note lack of outliers on y-axis).

337 For PC3, latitude, elevation, and two frost variables (beginning frost-free period and frost-free  
338 period) had the highest loadings (Supplementary Figure 9). The majority (78%) of the Aridity  
339 SNPs were outliers with PC3 (Supplementary Figure 10B, note outliers as orange dots on  
340 y-axis). Based on the PC association, this would lead one to conclude that the Aridity SNPs  
341 show associations with latitude, elevation, and frost-free period. While the Aridity SNPs do have  
342 strong associations with latitude (5th row in Figure 2B), they show very weak associations with  
343 the beginning of frost-free period, elevation, and frost-free period length (3rd, 4th, and last row  
344 in Figure 2B, respectively). Thus, interpretation of the environmental drivers of selection based  
345 on associations with PC3 would have been very different from the univariate associations.

#### 346 *Interpretation of multivariate allele associations*

347 While the network visualization gave insight into patterns of LD among loci, it does not give  
348 insight into patterns of allele frequency change on the landscape, relative to the ancestral state.  
349 As illustrated above, principal components would not be useful for this latter visualization.  
350 Instead, we accomplished this by plotting the association of a derived allele with one  
351 environmental variable against the association of that allele with a second environmental  
352 variable. Note that when the two environmental variables themselves are correlated on the  
353 landscape, an allele with a larger association in one environment will also have a larger  
354 association with a second environment, regardless of whether or not selection is shaping those  
355 associations. We can visualize (i) the expected genome-wide covariance (given  
356 correlations between environmental variables; Fig 1A left panel) using shading of quadrants and  
357 (ii) the observed genome-wide covariance using a 95% prediction ellipse (Figure 4). Since

358 alleles were coded according to their putative ancestral state in loblolly pine (*Pinus taeda*), the  
359 location of any particular SNP in the plot represents the bivariate environment in which the  
360 derived allele is found in higher frequency than the ancestral allele (Figure 4). Visualizing the  
361 data in this way allows us to understand the underlying correlation structure of the data, as well  
362 as to develop testable hypotheses about the true selective environment and the fitness of the  
363 derived allele relative to the ancestral allele.

364 We overlaid the top candidate SNPs, colored according to their grouping in the co-association  
365 network analysis, on top of this genome-wide pattern (for the 668 of 801 top candidates for  
366 which the derived allele could be determined). We call these plots “galaxy biplots” because of  
367 the characteristic patterns we observed when visualizing data this way (Figure 5). Galaxy biplots  
368 revealed that SNPs in the Aridity group showed associations with hot/dry versus cold/wet  
369 environments (red points in Figure 5A), while SNPs in the Multi and Freezing groups showed  
370 patterns of associations with hot/wet versus cold/dry environments (blue and green dots in  
371 Figure 5A). These outlier patterns became visually stronger for some SNPs and environments  
372 after correcting associations for population structure (compare Figure 5A to Figure 5B,  
373 structure-corrected allele frequencies calculated with Bayenv2, see *Methods*). Most SNPs in the  
374 Freezing group showed associations with elevation but not latitude (compare height of blue  
375 points on y-axis of Figure 5C to Figure 5E). Conversely, the large co-association module in the  
376 Multi group (gene #1, dark green points) showed associations with latitude but not elevation,  
377 while the second co-association module in the Multi group (genes #2-3, light green points)  
378 showed associations with both latitude and elevation (compare height of points on y-axis of  
379 Figure 5C to Figure 5E). Note how the structure correction polarized these patterns somewhat  
380 without changing interpretation, suggesting that the structure-corrected allelic associations

381 become more extreme when their pattern of allele frequency contrasted the background  
382 population structure (compare left column of Figure 5 to right column of Figure 5).

383 Some modules were particularly defined by the fact that almost all the derived alleles changed  
384 frequency in the same direction (e.g., sweep-like signatures). For instance, for the  
385 co-association module in the Multi group defined by genes #2-3, 14 of the 16 derived SNPs  
386 were found in higher frequencies at colder temperatures, higher elevations, and higher latitudes.  
387 Contrast this with a group of SNPs from an co-association module in the Freezing group defined  
388 by gene #32, in which 14 of 15 derived SNPs were found in higher frequencies in warmer  
389 temperatures and lower elevations, but showed no associations with latitude. These may be  
390 candidates for genotypes that have risen in frequency to adapt to particular environmental  
391 conditions on the landscape.

392 Conversely, other modules showed different combinations of derived alleles that arose in  
393 frequency at opposite values of environmental variables. For instance, derived alleles in the  
394 Aridity co-association module were found in higher frequency in either warm, dry environments  
395 (88 of 155 SNPs) or in cold, moist environments (67 of 155 SNPs). Similarly, for the Multi  
396 co-association module defined by gene #1, derived alleles were found in higher frequency in  
397 either cold, dry environments (15 of 37 SNPs) or in warm, moist environments (22 of 37 SNPs).  
398 These may be candidates for genes acted on by antagonistic pleiotropy within a locus (Table 1),  
399 in which one genotype is selected for at one extreme of the environment and another genotype  
400 is selected for at the other extreme of the environment. Unfortunately, we were unable to fully  
401 characterize the relative abundance of sweep-like vs. antagonistically pleiotropic patterns  
402 across all top candidate genes due to (i) the low number of candidate SNPs for most genes, and

403 (ii) for many SNPs the derived allele could not be determined (because there was a missing  
404 SNP or other missing data in the ancestral species).

405 We also visualized the patterns of allele frequency on the landscape for two representative  
406 SNPs, chosen because they had the highest number of connections in their co-association  
407 module (and were more likely to be true positives, see *Results: Simulated datasets*).

408 Geographic and climatic patterns are illustrated with maps for two such SNPs: (i) a SNP in the  
409 Multi co-association module defined by gene #1 is shown in Figure 6A (with significant  
410 associations with latitude and mean annual temperature), and (ii) a SNP in the Aridity  
411 co-association module (Figure 6B, gene #8 from Figure 2, with significant associations with  
412 annual heat:moisture index and latitude). These maps illustrate the complex environments that  
413 may be selecting for particular combinations of genotypes despite potentially high gene flow in  
414 this widespread species.

#### 415 *Candidate gene annotations*

416 Although many of the candidate genes were not annotated, as is typical for conifers, the genes  
417 underlying adaptation to these environmental gradients had diverse putative functions. The top  
418 candidate SNPs were found in 3' and 5' untranslated regions and open reading frames in higher  
419 proportions than all exome SNPs (Supplemental Figure S11). A gene ontology (GO) analysis  
420 using previously assigned gene annotations [46, 55] found that a single molecular function,  
421 solute:cation antiporter activity, was over-represented across all top candidate genes  
422 (Supplemental Table S1). In the Aridity and Geography groups, annotated genes included  
423 sodium or potassium ion antiporters (one in Aridity, a KEA4 homolog, and two in Geography,  
424 NHX8 and SOS1 homologs), suggestive of a role in drought, salt or freezing tolerance [56].  
425 Genes putatively involved in auxin biosynthesis were also identified in the Aridity (YUCCA 3)

426 and Geography (Anthranilate synthase component) groups (Supplemental Table S2),  
427 suggestive of a role in plant growth. In the Freezing and Geography groups, several flowering  
428 time genes were identified [57] including a homolog of CONSTANS [58] in the Freezing group  
429 and a homolog of FY, which affects FCA mRNA processing, in the Geography group [58] (Supp  
430 Table 2). In addition, several putative drought/stress response genes were identified, such as  
431 DREB transcription factor [59] and an RCD1-like gene (Supplemental Table 2). RCD-1 is  
432 implicated in hormonal signaling and in the regulation of several stress-responsive genes in  
433 *Arabidopsis thaliana* [57]. In the Multi group, the only gene that was annotated functions in  
434 acclimation of photosynthesis to the environment in *A. thaliana* [60].

435 Of the 47 candidate genes identified by Yeaman et al. 2016 as undergoing convergent evolution  
436 for adaptation to low temperatures in lodgepole pine and the interior spruce hybrid complex  
437 (*Picea glauca*, *P. engelmannii*, and their hybrids), 10 were retained with our stringent criteria for  
438 top candidates. All of these genes grouped into the Freezing and Geography groups (shown by  
439 “\*” in Figure 2G): the two groups that had many SNPs with significant associations with  
440 elevation. This is consistent with the pattern of local adaptation in the interior spruce hybrid  
441 zone, whereby Engelmann spruce is adapted to higher elevations and white spruce is adapted  
442 to lower elevations [61].

#### 443 *Comparison of co-expression clusters to co-association modules*

444 To further explore if co-association modules have similar gene functions, we examined their  
445 gene expression patterns in response to climate treatments using previously published RNAseq  
446 data of 10,714 differentially expressed genes that formed 8 distinct co-expression clusters [55].  
447 Of the 108 top candidate genes, 48 (44%) were also differentially expressed among treatments  
448 in response to factorial combinations of temperature (cold, mild, or hot), moisture (wet vs. dry),



449 and/or day length (short vs. long day length). We found limited correspondence between  
450 co-association modules and co-expression clusters. Most of the top-candidate genes that were  
451 differentially expressed mapped to 2 of the 10 co-expression clusters previously characterized  
452 by [55] (Figure 7, blue circles are the P2 co-expression cluster and green triangles are the P7  
453 co-expression cluster previously described by [55]). Genes in the P2 co-expression cluster had  
454 functions associated with the regulation of transcription and their expression was strongly  
455 influenced by all treatments, while genes in the P7 co-expression cluster had functions relating  
456 to metabolism, photosynthesis, and response to stimulus [55]. Genes from the closely linked  
457 Aridity group mapped to 4 distinct co-expression clusters, contigs from the Freezing group  
458 mapped to 3 distinct co-expression clusters, and genes from the Geography group mapped to 3  
459 distinct co-expression clusters.

460 We used a Fisher exact test to determine if any co-expression cluster was over-represented in  
461 any of the the four major co-association groups shown in Figure 2. We found that the Freezing  
462 group was over-represented in the P2 co-regulated gene expression cluster ( $P < 0.05$ ) with  
463 seven (58%) of the Freezing genes found within the P2 expression cluster, revealing  
464 coordinated expression in response to climatic conditions. Homologs of four of the seven genes  
465 were present in *A. thaliana*, and three of these genes were transcription factors involved in  
466 abiotic stress response (*DREB* transcription factor), flowering time (*CONSTANS*,  
467 pseudoresponse regulator) or the circadian clock (pseudo-response regulator 9). No other  
468 significant over-representation of gene expression class was identified for the four association  
469 groups or for all adaptation candidate genes.

470 *Simulated datasets*

471 We used individual-based simulations to examine potential limitations of the co-association  
472 network analysis by comparing the connectedness of co-association networks arising from false  
473 positive neutral loci vs. a combination of false positive neutral loci and true positive loci that had  
474 experienced selection to an unmeasured environmental factor. Specifically, we used simulations  
475 with random sampling designs from three replicates across three demographic histories: (i)  
476 isolation by distance at equilibrium (IBD), and non-equilibrium range expansion from a (ii) single  
477 refuge (1R) or from (iii) two refugia (2R). These landscape simulations were similar to lodgepole  
478 pine in the sense that they simulated large effective population sizes and resulted in similar  $F_{ST}$   
479 across the landscape as that observed in pine ([62, 63],  $F_{ST}$  in simulations  $\sim 0.05$ , vs.  $F_{ST}$  in pine  
480  $\sim 0.016$  [46]). To explore how the allele frequencies that evolved in these simulations might yield  
481 spurious patterns under the co-association network analysis, we overlaid the 22 environmental  
482 variables used in the lodgepole pine dataset onto the landscape genomic simulations [62, 63].  
483 To simulate selection to an unmeasured environmental factor, a small proportion of SNPs (1%)  
484 were subjected to computer-generated spatially varying selection along a weak latitudinal cline  
485 [62, 63]. We assumed that 22 environmental variables were measured, but not the “true”  
486 selective environment; our analysis thus represents the ability of co-association networks to  
487 correctly cluster selected loci even when the true selective environment was unmeasured, but a  
488 number of other environmental variables were measured (correlations between the selective  
489 environment and the other variables ranged from 0 to 0.2). Note that the simulations differ from  
490 the empirical data in at least two ways: (i) there is only one selective environment (so we can  
491 evaluate whether a single selective environment could result in multiple co-association modules  
492 in the data given the correlation structure of observed environments), and (ii) loci were unlinked.

493 The  $P$ -value and Bayes factor criteria for choosing top candidate SNPs in the empirical data  
494 produced no false positives with the simulated datasets (Supplemental Figure 12 right column),  
495 although using these criteria also reduced the proportion of true positives. Therefore, we used  
496 less stringent criteria to analyze the simulations so that we could also better understand  
497 patterns created by unlinked, false positive neutral loci (Supplemental Figure 12 left column).

498 We found that loci under selection by the same environmental factor generally formed a single  
499 tightly connected co-association module even though they were unlinked, and that the degree of  
500 connectedness of selected loci was greater than among neutral loci (Figure 8). Thus, a single  
501 co-association module typically resulted from adaptation to the single selective environment in  
502 the simulations. This occurred because the distance threshold used to define connections in the  
503 co-association modules was chosen as one that enriched for connections among selected loci  
504 with non-random associations in allele frequencies due to selection by a common environmental  
505 factor (Supplementary Figure 13).

506 The propensity of neutral loci to form tightly-clustered co-association networks increased with  
507 the complexity of demographic history (compare Figure 8 IBD in left column to 2R in right  
508 column). For example, the false positive neutral loci from the two refugia (2R) model formed  
509 tightly connected networks, despite the fact that all simulated loci were unlinked. This occurred  
510 because of non-random associations in allele frequency due to a shared demographic history. In  
511 some cases, selected loci formed separate or semi-separate modules according to their  
512 strengths of selection, but the underlying patterns of association were the same (e.g. Figure 8A,  
513 Supplementary Figure 14).

## 514 Discussion

515 Co-association networks provide a valuable framework for interpreting the genetic architecture  
516 of local adaptation to the environment in lodgepole pine. Our most interesting result was the  
517 discovery of low recombination rates among genes putatively adapting to different and distinct  
518 aspects of climate, which was unexpected because selection is predicted to increase  
519 recombination between loci acted on by different sources of selection as discussed below. If the  
520 loci we studied were true causal loci, then different sources of selection were strong enough to  
521 reduce LD among *physically linked* loci in the genome, resulting in modular effects of loci on  
522 fitness in the environment. While the top candidate SNPs from most genes had associations  
523 with only a single environmental factor, for some genes we discovered evidence of  
524 environmental pleiotropy, i.e., candidate SNPs associated with multiple distinct aspects of  
525 climate. Within co-association modules, we observed a combination of local sweep-like  
526 signatures (in which derived alleles at a locus were all found in a particular climate, e.g., cold  
527 environments) and antagonistically pleiotropic patterns underlying adaptation to climate (in  
528 which some derived alleles at a locus were found at one environmental extreme and others  
529 found at the opposite extreme), although we could not evaluate the relative importance of these  
530 patterns. Finally, we observed that the modularity of candidate genes in their transcriptionally  
531 plastic responses to climate factors did not correspond to the modularity of these genes in their  
532 patterns of association with climate, as evidenced through comparing co-association networks  
533 with co-expression networks. These results give insight into evolutionary debates about the  
534 extent of modularity and pleiotropy in the evolution of genetic architecture [18–24].

535 *Genetic architecture of adaptation: pleiotropy and modularity*

536 Most of the top candidate genes in our analysis do not exhibit universal pleiotropy to distinct  
537 aspects of climate as defined by the expected pattern outlined in Figure 1B. Our results are  
538 more consistent with the the Hypothesis of Modular Pleiotropy [19], in which loci may have  
539 extensive effects *within* a distinct aspect of the environment (as defined by the variables that  
540 associate with each co-association module), but few pleiotropic effects *among* distinct aspects  
541 of the environment. These results are in line with theoretical predictions that modular  
542 architectures should be favored when there are many sources of selection in complex  
543 environments [26]. But note also that if many pleiotropic effects are weak, the stringent  
544 statistical thresholds used in our study to reduce false positives may also reduce the extent to  
545 which pleiotropy is inferred [20, 21]. Therefore in our study, any pleiotropic effects of genes on  
546 fitness detected in multiple aspects of climate are likely to be large effects, and we refrain to  
547 making any claims as to the extent of environmental pleiotropy across the entire genome.

548 The extent of pleiotropy *within* individual co-association modules is hard to quantify, as for any  
549 given module we observed associations between genes and several environmental variables.  
550 Associations between a SNP and multiple environmental variables may or may not be  
551 interpreted as extensive environmental pleiotropic effects, depending on whether univariate  
552 environmental variables are considered distinct climatic factors or collectively represent a single  
553 multivariate optimum. In many cases, these patterns are certainly affected by correlations  
554 among the environmental variables themselves.

555 Our results also highlight conceptual issues with the definition of and interpretation of pleiotropic  
556 effects on distinct aspects of fitness from real data: namely, what constitutes a “distinct aspect”  
557 (be it among traits, components of fitness, or aspects of the environment)? In this study we

558 defined the selective environment through the perspective of those environmental variables we  
559 tested for associations with SNPs, using a threshold that produced reasonable results in  
560 simulation. But even with this definition, some co-association modules are more similar in their  
561 multivariate environmental “niche” than others. For instance, genes within the Geography group  
562 could be interpreted to have extensive pleiotropic effects if the patterns of associations of each  
563 individual module were taken to be “distinct,” or they may be considered to have less extensive  
564 pleiotropic effects if their patterns of associations were too similar to be considered “distinct.”  
565 While the framework we present here is a step toward understanding and visualizing this  
566 hierarchical nature of “distinct aspects” of environmental factors, a more formal framework is  
567 needed to quantify the distinctness of pleiotropic effects.

#### 568 *Genetic architecture of adaptation: linkage*

569 We also observed physical linkage among genes that were associated with very distinct aspects  
570 of climate. This was somewhat unexpected from a theoretical perspective: while selection  
571 pressures due to genome organization may be weak, if anything, selection would be expected  
572 to disfavour linkage and increase recombination between genes adapting to selection pressures  
573 with different spatial patterns of variation [34–36]. Interestingly, while the linkage map suggests  
574 that these loci are sometimes located relatively close together on a single chromosome, this  
575 does not seem to be sufficient physical linkage to also cause a noticeable increase in LD. In  
576 other words, it is possible that the amount of physical linkage sometimes observed between  
577 genes in different co-association modules is not strong enough to constrain adaptation to these  
578 differing gradients. Genetic maps and reference genomes are not yet well developed for the  
579 large genomes of conifers; improved genetic maps or assembled genomes will be required to  
580 explore these questions in greater depth. If this finding is robust and not compromised by false

581 positives, physical linkage among genes adapting to different climatic factors could either  
582 facilitate or hinder a rapid evolutionary response as the multivariate environment changes [4, 5].  
583 Within co-association modules, we observed varying patterns of physical linkage among genes.  
584 The Aridity group, in particular, consisted of several tightly linked genes that may have arisen for  
585 a number of different reasons. Clusters of physically linked genes such as this may act as a  
586 single large-effect QTL [64] and may have evolved due to competition among alleles or genomic  
587 rearrangements [30, although these are rare in conifers], increased establishment probability  
588 due to linked adaptive alleles [4], or divergence within inversions [32]. Alternatively, if the Aridity  
589 region was one of low recombination, a single causal variant could create the appearance of  
590 linked selection [65], a widespread false positive signal may have arisen due to genomic  
591 variation such as background selection and increased drift [66–68], or a widespread false signal  
592 may have arisen due to a demographic process such as allele surfing [69, 70].

593 *Genetic architecture of adaptation: modularity of transcriptional plasticity vs. fitness*

594 We also compared co-expression networks to co-association networks. Genes that showed  
595 similar responses in expression in lodgepole pine seedlings in response to experimental climatic  
596 treatments form a co-expression network. Since co-expression networks have been successful  
597 at identifying genes that respond the same way to environmental stimuli [71], it might be  
598 reasonable to expect that if these genes were adapting to climate they would also show similar  
599 patterns of associations with climate variables. However, differential expression analyses only  
600 identify genes with plastic transcriptional responses to climate. Plasticity is not a prerequisite for  
601 adaptation and may be an alternative strategy to adaptation. This is illustrated by our result that  
602 only half of our top candidate contigs for adaptation to climate were differentially expressed in  
603 response to climate conditions.

604 Interestingly, loci located within the same co-association module (groups of loci that are  
605 putatively favored or linked to loci putatively favored by natural selection) could be found in  
606 different co-expression clusters. For example, we observed that loci from the tightly linked  
607 Aridity module had many distinct expression patterns in response to climate treatments.  
608 Conversely, candidate genes that were associated with different aspects of the multivariate  
609 environment (because they were located in different co-association modules) could nonetheless  
610 be co-expressed in response to specific conditions. These observations support the speculation  
611 that the developmental/functional modularity of plasticity may not correspond to the modularity  
612 of the genotype to fitness map; however, the power of the analysis could be low due to stringent  
613 statistical cutoffs and these patterns warrant further investigation.

#### 614 *Physiological adaptation of lodgepole pine to climate*

615 It is challenging to disentangle the physiological effects and importance of freezing versus  
616 drought in the local adaptation of conifers to climate. We found distinct groups of candidate  
617 genes along an axis of warm/wet to cold/dry (co-association modules in the Freezing and Multi  
618 groups), and another distinct group along an axis of cold/wet to warm/dry (the Aridity  
619 co-association module). Selection by drought conditions in winter may occur through extensive  
620 physiological remodeling that allows cells to survive intercellular freezing by desiccating  
621 protoplasts - but also results in drought stress at the cellular level [55]. Another type of winter  
622 drought injury in lodgepole pine - red belt syndrome - is caused by warm, often windy events in  
623 winter, when foliage desiccates but the ground is too cold for roots to be able to supply water  
624 above ground [72]. This may contrast with drought selection in summer, when available soil  
625 water is lowest and aridity highest. The physiological and cellular mechanisms of drought and



626 freezing response have similarities but also potentially important differences that could be  
627 responsible for the patterns we have observed.

628 Our results provide a framework for developing hypotheses that will help to disentangle  
629 selective environments and provide genotypes for assisted gene flow in reforestation [73]. While  
630 climate change is expected to increase average temperatures across this region, some areas  
631 are experiencing more precipitation than historic levels and others experiencing less [74]. Tree  
632 mortality rates are increasing across North America due to increased drought and vapour  
633 pressure deficit for tree species including lodgepole pine, and associated increased vulnerability  
634 to damaging insects, but growth rates are also increasing with warming temperatures and  
635 increased carbon dioxide [75, 76]. Hot, dry valleys in southern BC are projected to have novel  
636 climates emerge that have no existing analogues in North America [77]. The considerable  
637 standing adaptive variation we observe here involving many genes could facilitate adaptation to  
638 new temperature and moisture regimes, or could hinder adaptation if novel climates are at odds  
639 with the physical linkage among alleles adapted to different climate stressors.

#### 640 *Limitations of associations with principal components*

641 For these data, testing associations of genes with PC-based climate variables would have led to  
642 a very limited interpretation of the environmental drivers of selection because the PC ordination  
643 is not biologically informed as to what factors are driving divergent selection [37]. First, many  
644 putative candidates in the Freezing and Geography groups would have been missed. Second,  
645 strong associations between the Multi SNPs and environmental variables that did not load  
646 strongly onto PC1, such as latitude, would have also been missed. Finally, many Aridity SNPs  
647 were outliers in PC3, which was strongly correlated with variables that the Aridity SNPs did not  
648 have any significant associations with. This occurred because no single variable loaded strongly

649 onto PC3 (the maximum loading of any single variable was 0.38) and many variables had  
650 moderate loadings, such that no single environmental variable explained the majority of the  
651 variance (the maximum variance explained by any one variable was 15%). Thus, associations  
652 with higher PC axes become increasingly difficult to interpret when the axis itself explains less  
653 variance of the multivariate environment and the environmental factors loading onto that axis  
654 explain similar amounts of variance in that axis. While principal components will capture the  
655 environmental factors that covary the most, this may have nothing to do with the combinations  
656 that drive divergent selection and local adaptation. This needlessly adds a layer of complexity to  
657 an analysis that may not reveal anything biologically important. In contrast, co-association  
658 networks highlight those combinations of environments that are biologically important for those  
659 genes likely involved in local adaptation.

#### 660 *Benefits and caveats of co-association networks*

661 Co-association networks provide an intuitive and visual framework for understanding patterns of  
662 associations of genes and SNPs across many potentially correlated environmental variables. By  
663 parsing loci into different groups based on their associations with multiple variables, this  
664 framework offers a more informative approach than grouping loci according to their outlier status  
665 based on associations with single environmental variables. While in this study we have used  
666 them to infer groups of loci that adapt to distinct aspects of the multivariate environment,  
667 co-association networks could be widely applied to a variety of situations, including  
668 genotype-phenotype associations. They offer the benefit of jointly identifying modules of loci and  
669 the groups of environmental variables that the modules are associated with. While the field may  
670 still have some disagreement about how modularity and pleiotropy should be defined,

671 measured, and interpreted [19–21, 23, 24], co-association networks at least provide a  
672 quantitative framework to define and visualize modularity.

673 Co-association networks differ from the application of bipartite network theory for estimating the  
674 degree of classical pleiotropic effects of genes on traits [3]. Bipartite networks are two-level  
675 networks where the genes form one type of nodes and the traits form the second type of nodes,  
676 then a connection is drawn from a gene to a trait if there is a significant association [3]. The  
677 degree of pleiotropy of a locus is then inferred by the number of traits that gene is connected to.

678 With the bipartite network approach, trait nodes are defined by those traits measured, and not  
679 necessarily the multivariate effects from the perspective of the gene (e.g., a gene that affects  
680 organism size will have effects on height, weight and several other variables - if all these traits  
681 are analyzed, this gene would be inferred to have large pleiotropic effects). Even if highly  
682 correlated traits are removed, simulations have shown that even mild correlations in mutational  
683 effects can bias estimates of pleiotropy from bipartite networks [20, 21]. The advantage of  
684 co-association networks is their ability to identify combinations of variables (be they traits or  
685 environments) that associate with genetic (or SNP) modules. Correlated variables that measure  
686 essentially the same environment or phenotype will simply cluster together in a module, which  
687 can facilitate interpretation. On the other hand, correlated variables that measure different  
688 aspects of the environment or phenotype may cluster into different modules (as we observed in  
689 this study). The observed combinations of associations can then be used to develop and test  
690 hypotheses as to whether the genotype-environment combination represents a single  
691 multivariate environment that the gene is adapting to (in the case of allele associations with  
692 environment or fitness) or a single multivariate trait that the gene affects (in the case of allele  
693 associations with phenotypes).

694 While co-association networks hold promise for elucidating the modularity and pleiotropy of the  
695 genotype-phenotype-fitness map, some caveats should be noted. First, correlations among  
696 variables will make it difficult to infer the exact conditions that select for or the exact traits that  
697 associate with particular allelic combinations. Results from this framework can make it easier,  
698 however, to generate hypotheses that can be tested with future experiments. Second, the  
699 analysis of simulated data shows that investigators should consider demographic history and  
700 choose candidates with caution for data analysis to exclude false positives, as we have  
701 attempted here. Co-association networks can arise among unlinked neutral loci by chance, and  
702 it is almost certain that some proportion of the “top candidate SNPs” in this study are false  
703 positives due to linkage with causal SNPs or due to demographic history. The simulated data  
704 also showed, however, that causal SNPs tend to have a higher degree of connection in their  
705 co-association network than neutral loci, and this might help to prioritize SNPs for follow up  
706 experiments, SNP arrays, and genome editing. Third, it may be difficult to draw conclusions  
707 about the level of modularity of the genetic architecture. The number of modules may be  
708 sensitive to the statistical thresholds used to identify top candidate SNPs [20, 21] as well as the  
709 distance threshold used to identify modules. With our data, the number of co-associations  
710 modules and the number of SNPs per module were not very sensitive to increasing this  
711 threshold by 0.05, but our results were sensitive to decreasing the threshold 0.05 (a stricter  
712 threshold resulted in smaller modules of SNPs with extremely similar associations, and a large  
713 number of “modules” comprised of a single SNP unconnected to other SNPs, even SNPs in the  
714 same gene) (results not shown). While inferred modules composed of a single SNP could be  
715 interpreted as unique, our simulations also show that neutral loci are more likely to be  
716 unconnected in co-association networks. Many alleles of small effect may be just below  
717 statistical detection thresholds, and whether or not these alleles are included could profoundly

718 change inference as to the extent of pleiotropy [20, 21]. This presents a conundrum common to  
719 most population genomic approaches for detecting selection, because lowering statistical  
720 thresholds will almost certainly increase the number of false positives, while only using very  
721 stringent statistical thresholds may decrease the probability of observing pleiotropy if many  
722 pleiotropic effects are weak [20]. Thus, while co-association networks are useful for identifying  
723 SNP modules associated with correlated variables, further work is necessary to expand this  
724 framework to quantitatively measure pleiotropic effects in genomes.

## 725 Conclusions

726 In this study we discovered physical linkage among loci putatively adapting to different aspects  
727 of the climate. These results give rare insight into both the ecological pressures that favor the  
728 evolution of modules by natural selection [19] and into the organization of genetic architecture  
729 itself. As climate changes, the evolutionary response will be determined by the extent of  
730 physical linkage among these loci, in combination with the strength of selection and phenotypic  
731 optima across environmental gradients, the scale and pattern of environmental variation, and  
732 the details of migration and demographic fluctuations across the landscape. While theory has  
733 made strides to provide a framework for predicting the genetic architecture of local adaptation  
734 under divergence with gene flow to a single environment [4, 30, 31, 78–82], as well as the  
735 evolution of correlated traits under different directions and/or strengths of selection when those  
736 traits have a common genetic basis [35, 36], how genetic architectures evolve on complex  
737 heterogeneous landscapes has not been clearly elucidated. Furthermore, it has been difficult to  
738 test theory because the field still lacks frameworks for evaluating empirical observations of  
739 adaptation in many dimensions. Here, we have attempted to develop an initial framework for  
740 understanding adaptation to several complex environments with different spatial patterns, which

741 may also be useful for understanding the genetic basis of multivariate phenotypes from  
742 genome-wide association studies. This framework lays the foundation for future studies to study  
743 modularity across the genotype-phenotype-fitness continuum.

## 744 **Methods**

### 745 *Sampling and climate*

746 This study uses the same dataset analyzed by Yeaman et al. [46], but with a different focus as  
747 explained in the introduction. Briefly, we obtained seeds from 281 sampling locations of  
748 lodgepole pine from reforestation collections for natural populations, and these locations were  
749 selected to represent the full range of climatic and ecological conditions within the species  
750 range in British Columbia and Alberta based on ecosystem delineations. Seeds were grown in a  
751 common garden and 2-4 individuals were sampled from each sampling location. The  
752 environment for each sampling location was characterized by estimating climate normals  
753 for 1961-1990 from geographic coordinates using the software package ClimateWNA [83]. The  
754 program extracts and downscales the moderate spatial resolution generated by PRISM [84] to  
755 scale-free and calculates many climate variables for specific locations based on latitude,  
756 longitude and elevation. The downscaling is achieved through a combination of bilinear  
757 interpolation and dynamic local elevational adjustment. We obtained 19 climatic and 3  
758 geographical variables (latitude, longitude, and elevation). Geographic variables may correlate  
759 with some unmeasured environmental variables that present selective pressure to populations  
760 (e.g., latitude correlates with day length). Many of these variables were correlated with each  
761 other on the landscape (Figure 2A).

762 *Sequencing, bioinformatics, and annotation*

763 The methods for this section are identical to those reported in [46]. Briefly, DNA from frozen  
764 needle tissue was purified using a Macherey-Nagel Nucleospin 96 Plant II Core kit automated  
765 on an Eppendorf EpMotion 5075 liquid handling platform. One microgram of DNA from each  
766 individual tree was made into a barcoded library with a 350 bp insert size using the BioO  
767 NEXTflex Pre-Capture Combo kit. Six individually barcoded libraries were pooled together in  
768 equal amounts before sequence capture. The capture was performed using custom Nimblegen  
769 SeqCap probes [46 for more details, see 47] and the resulting captured fragments were  
770 amplified using the protocol and reagents from the NEXTflex kit. All sample preparation steps  
771 followed the recommended protocols provided. After capture, each pool of six libraries was  
772 combined with another completed capture pool and the 12 individually barcoded samples were  
773 then sequenced, 100 base pair paired-end, on one lane of an Illumina HiSeq 2500 (at the McGill  
774 University and Genome Quebec Innovation Centre).

775 Sequenced reads were filtered and aligned to the loblolly pine genome [85] using bwa mem [86]  
776 and variants were called using GATK Unified Genotyper [87], with steps included for removal of  
777 PCR duplicates, realignment around indels, and base quality score recalibration [46, 87]. SNPs  
778 calls were filtered to eliminate variants that did not meet the following cutoffs: quality score  $\geq$   
779 20, map quality score  $\geq$  45, FisherStrand score  $\leq$  33, HaplotypeScore  $\leq$  7, MQRankSumTest  
780  $\leq$  -12.5, ReadPosRankSum  $>$ -8, and allele balance  $<$  2.2, minor allele frequency  $>$  5%, and  
781 genotyped successfully in  $>$ 10% of individuals. Ancestral alleles were coded as a 0 and derived  
782 alleles coded as a 1 for data analysis.

783 We used the annotations developed for pine in [46]. Briefly, we performed a BLASTX search  
784 against the TAIR 10 protein database and identified the top blast hit for each transcript contig

785 (e-value cut-off was  $10^{-6}$ ). We also performed a BLASTX against the nr database screened for  
786 green plants and used Blast2GO [88] to assign GO terms and enzyme codes [46 for details, see  
787 55]. We also assigned GO terms to each contig based on the GO *A. thaliana* mappings and  
788 removed redundant GO terms. To identify if genes with particular molecular function and  
789 biological processes were over-represented in top candidate genes, we performed a GO  
790 enrichment analysis using topGO [89]. All GO terms associated with at least two candidate  
791 genes were analyzed for significant over-representation within each group and in all candidate  
792 genes (FDR 5%).

### 793 *Top Candidate SNPs*

794 First, top candidate genes were obtained from [46]. For this study, genes with unusually strong  
795 signatures of association from multiple association tests (uncorrected genotype-phenotype and  
796 genotype-environment correlations, for details see [46]) were identified as those with more  
797 outlier SNPs than expected by random with a probability of  $P < 10^{-9}$ , which is a very restrictive  
798 cutoff (note that due to non-independence among SNPs in the same contig, this  $P$ -value is an  
799 index, and not an exact probability). Thus, the subsequent analysis is limited to loci that we  
800 have the highest confidence are associated with adaptation as evidenced by a large number of  
801 significant SNPs (not necessarily the loci with the largest effect sizes).

802 For this study, we identified top candidate SNPs within the set of top candidate genes. These  
803 “top candidate SNPs” had genetic-environment associations with (i)  $P$ -values lower than the  
804 Bonferroni cutoff for the uncorrected Spearman’s  $\rho$  ( $\sim 10^{-8} = 0.05/(\text{number of SNPs times the}$   
805  $\text{number of environmental variables})$ ) and (ii)  $\log_{10}(\text{BF}) > 2$  for the structure-corrected Spearman’s  
806  $\rho$  (Bayenv2, for details see below). The resulting set of candidate SNPs reject the null  
807 hypothesis of no association with the environment with high confidence. In subsequent



808 analyses we interpret the results both before and after correction for population structure, to  
809 ensure that structure correction does not change our overall conclusions. Note that because  
810 candidate SNPs are limited to the top candidate genes in order to reduce false positives in the  
811 analysis, these restrictive cutoffs may miss many true positives.

812 For uncorrected associations between allele frequencies and environments, we calculated the  
813 non-parametric rank correlation Spearman's  $\rho$  between allele frequency for each SNP and each  
814 environmental variable. For structure-corrected associations between allele frequencies and  
815 environments, we used the program Bayenv2 [39]. Bayenv2 is implemented in two steps. In the  
816 first step the variance-covariance matrix is calculated from allelic data. As detailed in [46] set of  
817 non-coding SNPs to calculate the variance-covariance matrix from the final run of the MCMC  
818 after 100,000 iterations, with the final matrix averaged over 3 MCMC runs. In the second step,  
819 the variance-covariance matrix is used to control for evolutionary history in the calculation of test  
820 statistics for each SNP. For each SNP, Bayenv2 outputs a Bayes factor (a value that measures  
821 the strength of evidence in favor of a linear relationship between allele frequencies and the  
822 environment after population structure is controlled for) and Spearman's  $\rho$  (the non-parametric  
823 correlation between allele frequencies and environment variables after population structure is  
824 controlled for). Previous authors have found that the stability of Bayes factors is sensitive to the  
825 number of iterations in the MCMC [90]. We ran 3 replicate chains of the MCMC with 50,000  
826 iterations, which we found produced stable results. Bayes factors and structure-corrected  
827 Spearman's  $\rho$  were averaged over these 35 replicate chains and these values were used for  
828 analysis.

829 *Co-association networks*

830 We first organized the associations into a matrix with SNPs in columns, environments in rows,  
831 and the specific SNP-environment association in each cell. These data were used to calculate  
832 pairwise Euclidean distances between SNPs based on their associations, and this distance  
833 matrix was used to cluster SNP loci with Ward's hierarchical clustering using the hclust package  
834 in R. As described in the results, this resulted in 4 main groups in the data. For each of these  
835 main groups, we used undirected graph networks to visualize submodules of SNPs. Nodes  
836 (SNPs) were connected by edges if they had a pairwise Euclidean distance less than 0.1 from  
837 the distance matrix described above. We found that the results were not very sensitive to this  
838 distance threshold. Co-association networks were visualized using the igraph package in R v  
839 1.0.1 [91].

840 *Linkage disequilibrium*

841 Linkage disequilibrium was calculated among pairwise combinations of SNPs within genes  
842 (genes). Mean values of Pearson's correlation coefficient squared ( $r^2$ ) were estimated across all  
843 SNPs annotated to each pair of individual genes, excluding SNPs genotyped in fewer than 250  
844 individuals (to minimize the contribution of small sample sizes to the calculation of gene-level  
845 means).

846 *Recombination rates*

847 An Affymetrix SNP array was used to genotype 95 full-sib offspring from a single cross of two  
848 parents. Individuals with genotype posterior probabilities of  $> 0.001$  were filtered out. This array  
849 yielded data for 13,544 SNPs with mapping-informative genotypes. We used the package  
850 "onemap" in R with default settings to estimate recombination rates among pairs of loci,  
851 retaining all estimates with LOD scores  $> 3$  [92]. This dataset contained 2760 pairs of SNPs that

852 were found together on the same genomic contig, separated by a maximum distance of 13k  
853 base pairs. Of these 7,617,600 possible pairs, 521 were found to have unrealistically high  
854 inferred rates of recombination ( $r > 0.001$ ), and are likely errors. These errors probably occurred  
855 as a result of the combined effect of undetected errors in genotype calling, unresolved paralogy  
856 in the reference genome that complicates mapping, and differences between the reference  
857 loblolly genome that was used for SNP design and the lodgepole pine genomes. As a result,  
858 recombination rates that were low ( $r < 0.001$ ) were expected to be relatively accurate, but we do  
859 not draw any inferences about high recombination estimates among loci.

#### 860 *Associations with principal components of environments*

861 To compare inference from co-association networks to another multivariate approach, we  
862 conducted a principal components analysis of environments using the function `prcomp()` in R.  
863 Then, we used Bayenv2 to test associations with PC axes as described above and used  $BF > 2$   
864 as criteria for significance of a SNP on a PC axis. Note that this criterion is less conservative  
865 than that used to identify candidate SNPs for the network analysis (because it did not require  
866 the additional criteria of a significant Bonferroni-corrected  $P$ -value), so it should result in greater  
867 overlap between PC candidate SNPs and top candidate SNPs based on univariate  
868 associations.

#### 869 *Enrichment of co-expressed genes*

870 The co-expression data used in this study was previously published by [55]. To determine if  
871 adaptation cluster members had similar gene functions, we examined their gene expression  
872 patterns in response to seven growth chamber climate treatments using previously published  
873 RNAseq data [55]. Expression data was collected on 44 seedlings from a single sampling  
874 location, raised under common conditions, and then exposed to growth chamber environments

875 that varied in their temperature, moisture and photoperiod regimes. We used a Fisher's exact  
876 test to determine if genes with a significant climate treatment effect were over-represented in  
877 each of the 4 major groups and across all adaptation candidates relative to the other sequenced  
878 and expressed genes. In addition, Yeaman et al 2014 used weighted gene co-expression  
879 network analysis (WGCNA) to identify eight clusters of co-regulated genes among the seven  
880 climate treatments. We used a Fisher's exact test to determine if these previously identified  
881 expression clusters were over-represented in the any of the 4 major groups relative to the other  
882 sequenced and expressed genes.

### 883 *Galaxy biplots*

884 To give insight into how the species has evolved to inhabit multivariate environments relative to  
885 the ancestral state, we visualized the magnitude and direction of associations between the  
886 derived allele frequency and environmental variables. Allelic correlations with any pair of  
887 environmental variables can be visualized by plotting the value of the non-parametric rank  
888 correlation Spearman's  $\rho$  of the focal allele with variable 1 against the value with variable 2.  
889 Spearman's  $\rho$  can be calculated with or without correction for population structure. Note also  
890 that the specific location of any particular allele in a galaxy biplot depends on the way alleles are  
891 coded. SNP data were coded as 0, 1, or 2 copies of the loblolly reference allele. If the reference  
892 allele has positive Spearman's  $\rho$  with temperature and precipitation, then the alternate allele has  
893 a negative Spearman's  $\rho$  with temperature and precipitation. For this reason, the alternate allele  
894 at a SNP should be interpreted as a reflection through the origin (such that Quadrants 1 and 3  
895 are symmetrical and Quadrants 2 and 4 are symmetrical if the reference allele is randomly  
896 chosen).

897 A prediction ellipse was used to visualize the genome-wide pattern of covariance in allelic  
898 effects on a galaxy biplot. For two variables, the 2 x 2 variance-covariance matrix of  
899  $Cov(\rho(f, E_1), \rho(f, E_2))$ , where  $f$  is the allele frequency and  $E_x$  is the environmental variable,  
900 has a geometric interpretation that can be used to visualize covariance in allelic effects with  
901 ellipses. The covariance matrix defines both the spread (variance) and the orientation  
902 (covariance) of the ellipse, while the expected values or averages of each variable ( $E[E_1]$  and  
903  $E[E_2]$ ) represent the centroid or location of the ellipse in multivariate space. The geometry of the  
904 two-dimensional  $(1 - \alpha) \times 100\%$  prediction ellipse on the multivariate normal distribution can then  
905 be approximated by:

$$l_j = \sqrt{\lambda_j \chi_{df=2, \alpha}^2},$$

907 where  $l_j = \{1, 2\}$  represents the lengths of the major and minor axes on the ellipse, respectively,  $\lambda_j$   
908 represents the eigenvalues of the covariance matrix, and  $\chi_{df=2, \alpha}^2$  represents the value of the  $\chi^2$   
909 distribution for the desired  $\alpha$  value [93–95]. In the results, we plot the 95% prediction ellipse ( $\alpha =$   
910 0.05) corresponding to the volume within which 95% of points should fall assuming the data is  
911 multivariate normal, using the function `ellipsoidPoints()` in the R package `cluster`. This  
912 approach will work when there is a large number of unlinked SNPs in the set being visualized; if  
913 used on a candidate set with a large number of linked SNPs and/or a small candidate set with  
914 non-random assignment of alleles (i.e., allele assigned according to a reference), the  
915 assumptions of this visualization approach will be violated.

#### 916 *Visualization of allele frequencies on the landscape*

917 ESRI ArcGIS v10.2.2 was used to visualize candidate SNP frequencies across the landscape.  
918 Representative SNPs having the most edges within each sub-network were chosen and plotted

919 against climatic variables representative of those co-association modules. Mean allele  
920 frequencies were calculated for each sampled population and plotted using ESRI ArcGIS  
921 v10.2.2. Climate data and 1 km resolution rasters were obtained using ClimateWNA v5.40 [83]  
922 and shaded with colour gradients scaled to the range of climates across the sampling locations.  
923 The climates for each sampling location were also plotted, as some sampling locations were at  
924 especially high or low elevations relative to their surrounding landscapes. For clarity, only  
925 sampling locations containing at least two sampled individuals were plotted.

### 926 *Simulations*

927 The simulations used in this study are identical a subset of those previously published by [62,  
928 63]. Briefly, the simulator uses forward-in-time recurrence equations to model the evolution of  
929 independent haploid SNPs on a quasi-continuous square landscape. We modelled three  
930 demographic histories that resulted in the same overall neutral  $F_{ST}$  for each demography, but  
931 demographic history determined the distribution of  $F_{ST}$ 's around that mean. Isolation by distance  
932 (IBD) had the lowest variance, followed by demographic expansion from a single refuge (1R),  
933 and demographic expansion from two refugia 2R had the highest variance. The landscape size  
934 was 360 x 360 demes and migration was determined by a discretized version of a Gaussian  
935 dispersal kernel. Carrying capacity per deme differed slightly for each scenario to give the same  
936 overall neutral  $F_{ST} = 0.05$ . IBD was run until equilibrium at 10,000 generations, but 1R and 2R  
937 were only run for 1,000 generations in order to mimic the the expansion of lodgepole pine since  
938 the last glacial maximum [96]. All selected loci adapted to computer generated landscape with a  
939 weak north-south cline and spatial heterogeneity at smaller spatial scales with varying strengths  
940 of selection from weak ( $s = 0.001$ ) to strong ( $s = 0.1$ ). See [62, 63] for more details.

941 The simulations were then expanded in the following way: for each of the 22 environmental  
942 variables for lodgepole pine populations, we used interpolation to estimate the value of the  
943 variable at the simulated locations. This strategy preserved the correlation structure among the  
944 22 environmental variables. For each of the 22 variables, we calculated the uncorrected rank  
945 correlation (Spearman's  $\rho$ ) between allele frequency and environment. The 23rd  
946 computer-generated environment was not included in analysis, as it was meant to represent the  
947 hypothetical situation that there is a single unmeasured (and unknown) environmental variable  
948 that is the driver of selection. The 23rd environment was correlated from 0-0.2 with the other 22  
949 variables.

950 We compared two thresholds for determining which loci were retained for co-association  
951 network analysis, keeping loci with either: (i) a  $P$ -value lower than the Bonferroni correction  
952 ( $0.05/(\# \text{ environments} * \# \text{ simulated loci})$ ) and (ii) a log-10 Bayes Factor greater than 2 (for at  
953 least one of the environmental variables). Using both criteria is more stringent and both were  
954 used in the lodgepole pine analysis. In the simulations, however, we found that using both  
955 criteria resulted in no false positives in the outlier list (see Results); therefore we used only the  
956 first of these two criteria so that we could understand how false positives may affect  
957 interpretation of the co-association network analysis. For a given set of outliers (e.g., only false  
958 positives or false positives and true positives), hierarchical clustering and undirected graph  
959 networks were built in the same manner as described for the lodgepole pine data.

## 960 List of abbreviations

- 961 ● LD: Linkage disequilibrium
- 962 ● PC: Principal components
- 963 ● SNP: single nucleotide polymorphism

964 **Declarations**

965 **Ethics approval and consent to participate**

966 Not applicable.

967 **Consent for publication**

968 Not applicable.

969 **Availability of data and material**

970 The dataset(s) supporting the conclusions of this article are available in the Dryad repository  
971 [unique persistent identifier and hyperlink to dataset(s) in http:// format will be archived upon  
972 acceptance of manuscript].

973 **Competing interests**

974 The authors declare that they have no competing interests.

975 **Funding**

976 KEL was supported by a grant from the National Science Foundation (502483). This research  
977 was part of the AdapTree project, led by SNA and by Genome Canada (LSARP2010\_161REF),  
978 Genome BC, Genome Alberta, Alberta Innovates BioSolutions, the Forest Genetics Council of  
979 British Columbia, the British Columbia Ministry of Forests, Lands and Natural Resource  
980 Operations (BCMFLNRO), Virginia Polytechnic University, and the University of British  
981 Columbia.

982 **Authors' contributions**

983 KEL conceived of the analysis, conducted analyses, and lead writing of the manuscript. KH and  
984 SY did the bioinformatics and various specific analyses. JD created the allele frequency



985 landscape plots. SA led the AdapTree project. All authors contributed to writing of the  
986 manuscript.

## 987 **Acknowledgements**

988 We thank Sebastian E. Ramos-Onsins, Tanja Pyhäjärvi, an anonymous reviewer and PCI Evol  
989 Biol for comments that greatly improved this manuscript. Mike Whitlock provided valuable  
990 advice and feedback on various aspects of the research. We thank Jeremy Yoder for organizing  
991 the SNP chip data used for calculating the recombination rates. Pia Smets, Connor Fitzpatrick  
992 and Sarah Markert assembled and grew genetic materials, and Kristin Nurkowski prepared  
993 sequence capture libraries. Tongli Wang and Andreas Hamann selected populations based on  
994 climatic distribution of species. Seeds were kindly donated by 63 forest companies and  
995 agencies in Alberta and British Columbia (listed at [http://adaptree.forestry.](http://adaptree.forestry.ubc.ca/seed-contributors/)  
996 [ubc.ca/seed-contributors/](http://adaptree.forestry.ubc.ca/seed-contributors/)).

## 997 **References**

- 998 1. Hansen TF. The evolution of genetic architecture. *Annu Rev Ecol Evol Syst.* 2006;37:123–57.
- 999 2. Orr HA. Adaptation and the cost of complexity. *Evolution.* 2000;54:13–20.
- 1000 3. Wang Z, Liao B-Y, Zhang J. Genomic patterns of pleiotropy and the evolution of complexity. *Proc Natl*  
1001 *Acad Sci U S A.* 2010;107:18034–9.
- 1002 4. Aeschbacher S, Bürger R. The effect of linkage on establishment and survival of locally beneficial  
1003 mutations. *Genetics.* 2014;197:317–36.
- 1004 5. Reeve J, Ortiz-Barrientos D, Engelstädter J. The evolution of recombination rates in finite populations  
1005 during ecological speciation. *Proc Biol Sci.* 2016;283. doi:10.1098/rspb.2016.1243.
- 1006 6. Barton NH. Genetic linkage and natural selection. *Philos Trans R Soc Lond B Biol Sci.*  
1007 2010;365:2559–69.
- 1008 7. Wagner GP, Zhang J. The pleiotropic structure of the genotype-phenotype map: the evolvability of  
1009 complex organisms. *Nat Rev Genet.* 2011;12:204–13.
- 1010 8. Paaby AB, Rockman MV. The many faces of pleiotropy. *Trends Genet.* 2013;29:66–73.
- 1011 9. Savolainen O, Lascoux M, Merilä J. Ecological genomics of local adaptation. *Nat Rev Genet.*

- 1012 2013;14:807–20.
- 1013 10. Slatkin M. Gene flow and selection in a cline. *Genetics*. 1973;75:733–56.
- 1014 11. Slatkin M. Spatial patterns in the distributions of polygenic characters. *J Theor Biol*. 1978;70:213–28.
- 1015 12. Barton NH. Clines in polygenic traits. *Genet Res*. 1999;74:223–36.
- 1016 13. Felsenstein J. The theoretical population genetics of variable selection and migration. *Annu Rev*  
1017 *Genet*. 1976;10:253–80.
- 1018 14. Haldane JBS. The theory of a cline. *J Genet*. 1948;48:277–84.
- 1019 15. Haldane JBS. A mathematical theory of natural and artificial selection (Part VI, Isolation). *Math Proc*  
1020 *Cambridge Philos Soc*. 1930;26:220.
- 1021 16. Rellstab C, Gugerli F, Eckert AJ, Hancock AM, Holderegger R. A practical guide to environmental  
1022 association analysis in landscape genomics. *Mol Ecol*. 2015;24:4348–70.
- 1023 17. Hancock AM, Brachi B, Faure N, Horton MW, Jarymowycz LB, Sperone FG, et al. Adaptation to  
1024 climate across the *Arabidopsis thaliana* genome. *Science*. 2011;334:83–6.
- 1025 18. Boyle EA, Li YI, Pritchard JK. An expanded view of complex traits: From polygenic to omnigenic. *Cell*.  
1026 2017;169:1177–86.
- 1027 19. Wagner GP, Pavlicev M, Cheverud JM. The road to modularity. *Nat Rev Genet*. 2007;8:921–31.
- 1028 20. Hill WG, Zhang X-S. Assessing pleiotropy and its evolutionary consequences: pleiotropy is not  
1029 necessarily limited, nor need it hinder the evolution of complexity. *Nat Rev Genet*. 2012.  
1030 doi:10.1038/nrg2949-c1.
- 1031 21. Hill WG, Zhang X-S. On the pleiotropic structure of the genotype–phenotype map and the evolvability  
1032 of complex organisms. *Genetics*. 2012;190:1131–7.
- 1033 22. Rockman MV. The QTN program and the alleles that matter for evolution: all that’s gold does not  
1034 glitter. *Evolution*. 2012;66:1–17.
- 1035 23. Paaby AB, Rockman MV. Pleiotropy: what do you mean? Reply to Zhang and Wagner. *Trends Genet*.  
1036 2013;29:384.
- 1037 24. Wagner GP, Zhang J. Universal pleiotropy is not a valid null hypothesis: reply to Hill and Zhang. *Nat*  
1038 *Rev Genet*. 2012;13:296.
- 1039 25. Wagner GP. Homologues, natural kinds and the evolution of modularity. *Am Zool*. 1996;36:36–43.
- 1040 26. Le Nagard H, Chao L, Tenaillon O. The emergence of complexity and restricted pleiotropy in adapting  
1041 networks. *BMC Evol Biol*. 2011;11:326.
- 1042 27. Griswold CK. Pleiotropic mutation, modularity and evolvability. *Evol Dev*. 2006;8:81–93.
- 1043 28. Le Corre V, Kremer A. Genetic variability at neutral markers, quantitative trait land trait in a subdivided  
1044 population under selection. *Genetics*. 2003;164:1205–19.
- 1045 29. Hill WG, Robertson A. The effect of linkage on limits to artificial selection. *Genet Res*. 1966;8:269–94.
- 1046 30. Yeaman S. Genomic rearrangements and the evolution of clusters of locally adaptive loci. *Proc Natl*  
1047 *Acad Sci U S A*. 2013;110:E1743–51.

- 1048 31. Yeaman S, Aeschbacher S, Bürger R. The evolution of genomic islands by increased establishment  
1049 probability of linked alleles. *Mol Ecol.* 2016;25:2542–58.
- 1050 32. Kirkpatrick M. Chromosome inversions, local adaptation and speciation. *Genetics.* 2006;173:419–34.
- 1051 33. Schwander T, Libbrecht R, Keller L. Supergenes and complex phenotypes. *Curr Biol.*  
1052 2014;24:R288–94.
- 1053 34. Lenormand T, Otto SP. The evolution of recombination in a heterogeneous environment. *Genetics.*  
1054 2000;156:423–38.
- 1055 35. Guillaume F. Migration-induced phenotypic divergence: the migration-selection balance of correlated  
1056 traits. *Evolution.* 2011;65:1723–38.
- 1057 36. Chebib J, Guillaume F. What affects the predictability of evolutionary constraints using a G-matrix?  
1058 The relative effects of modular pleiotropy and mutational correlation. *Evolution.* 2017.  
1059 doi:10.1111/evo.13320.
- 1060 37. Houle D, Mezey J, Galpern P. Interpretation of the results of common principal components analyses.  
1061 *Evolution.* 2002;56:433–40.
- 1062 38. Frichot E, Schoville SD, Bouchard G, François O. Testing for associations between loci and  
1063 environmental gradients using latent factor mixed models. *Mol Biol Evol.* 2013;30:1687–99.
- 1064 39. Günther T, Coop G. Robust identification of local adaptation from allele frequencies. *Genetics.*  
1065 2013;195:205–20.
- 1066 40. Gautier M. Genome-wide scan for adaptive divergence and association with population-specific  
1067 covariates. *Genetics.* 2015;201:1555–79.
- 1068 41. Lasky JR, Des Marais DL, McKay JK, Richards JH, Juenger TE, Keitt TH. Characterizing genomic  
1069 variation of *Arabidopsis thaliana*: the roles of geography and climate. *Mol Ecol.* 2012;21:5512–29.
- 1070 42. Benestan L, Quinn BK, Maaroufi H, Laporte M, Clark FK, Greenwood SJ, et al. Seascape genomics  
1071 provides evidence for thermal adaptation and current-mediated population structure in American lobster  
1072 (*Homarus americanus*). *Mol Ecol.* 2016;25:5073–92.
- 1073 43. Hedrick PW. Genetic polymorphism in heterogeneous environments: a decade later. *Annu Rev Ecol*  
1074 *Syst.* 1986;17:535–66.
- 1075 44. Hedrick PW, Ginevan ME, Ewing EP. Genetic polymorphism in heterogeneous environments. *Annu*  
1076 *Rev Ecol Syst.* 1976;7:1–32.
- 1077 45. Barton NH. Multilocus clines. *Evolution.* 1983;37:454–71.
- 1078 46. Yeaman S, Hodgins KA, Lotterhos KE, Suren H, Nadeau S, Degner JC, et al. Convergent local  
1079 adaptation to climate in distantly related conifers. *Science.* 2016;353:1431–3.
- 1080 47. Suren H, Hodgins KA, Yeaman S, Nurkowski KA, Smets P, Rieseberg LH, et al. Exome capture from  
1081 the spruce and pine giga-genomes. *Mol Ecol Resour.* 2016;16:1136–46.
- 1082 48. Hodgins KA, Yeaman S, Nurkowski KA, Rieseberg LH, Aitken SN. Expression divergence is  
1083 correlated with sequence evolution but not positive selection in conifers. *Mol Biol Evol.* 2016;33:1502–16.
- 1084 49. Eckert AJ, Bower AD, González-Martínez SC, Wegrzyn JL, Coop G, Neale DB. Back to nature:  
1085 ecological genomics of loblolly pine (*Pinus taeda*, Pinaceae). *Mol Ecol.* 2010;19:3789–805.

- 1086 50. Eckert AJ, van Heerwaarden J, Wegrzyn JL, Nelson CD, Ross-Ibarra J, González-Martínez SC, et al.  
1087 Patterns of population structure and environmental associations to aridity across the range of loblolly pine  
1088 (*Pinus taeda* L., Pinaceae). *Genetics*. 2010;185:969–82.
- 1089 51. Alberto FJ, Aitken SN, Alía R, González-Martínez SC, Hänninen H, Kremer A, et al. Potential for  
1090 evolutionary responses to climate change - evidence from tree populations. *Glob Chang Biol*.  
1091 2013;19:1645–61.
- 1092 52. Howe GT, Aitken SN, Neale DB, Jermstad KD, Wheeler NC, Chen THH. From genotype to  
1093 phenotype: unraveling the complexities of cold adaptation in forest trees. *Can J Bot*. 2003;81:1247–66.
- 1094 53. Liepe KJ, Hamann A, Smets P, Fitzpatrick CR, Aitken SN. Adaptation of lodgepole pine and interior  
1095 spruce to climate: implications for reforestation in a warming world. *Evol Appl*. 2016;9:409–19.
- 1096 54. Illingworth K. Study of lodgepole pine genotype-environment interaction in B.C. In: Proceedings  
1097 International Union of Forestry Research Organizations (IUFRO) Joint Meeting of Working parties:  
1098 Douglas-fir provenances, Lodgepole Pine Provenances, Sitka Spruce Provenances and Abies  
1099 Provenances. Vancouver, British Columbia, Canada; 1978. p. 151–8.
- 1100 55. Yeaman S, Hodgins KA, Suren H, Nurkowski KA, Rieseberg LH, Holliday JA, et al. Conservation and  
1101 divergence of gene expression plasticity following c. 140 million years of evolution in lodgepole pine  
1102 (*Pinus contorta*) and interior spruce (*Picea glauca* × *Picea engelmannii*). *New Phytol*. 2014;203:578–91.
- 1103 56. Blumwald E, Aharon GS, Apse MP. Sodium transport in plant cells. *Biochimica et Biophysica Acta*  
1104 (BBA) - Biomembranes. 2000;1465:140–51.
- 1105 57. Ahlfors R, Lång S, Overmyer K, Jaspers P, Brosché M, Tauriainen A, et al. *Arabidopsis*  
1106 RADICAL-INDUCED CELL DEATH1 belongs to the WWE protein-protein interaction domain protein  
1107 family and modulates abscisic acid, ethylene, and methyl jasmonate responses. *Plant Cell*.  
1108 2004;16:1925–37.
- 1109 58. Amasino RM, Michaels SD. The timing of flowering. *Plant Physiol*. 2010;154:516–20.
- 1110 59. Singh D, Laxmi A. Transcriptional regulation of drought response: a tortuous network of transcriptional  
1111 factors. *Front Plant Sci*. 2015;6:895.
- 1112 60. Walters RG, Shephard F, Rogers JJM, Rolfe SA, Horton P. Identification of mutants of *Arabidopsis*  
1113 defective in acclimation of photosynthesis to the light environment. *Plant Physiol*. 2003;131:472–81.
- 1114 61. De La Torre A, Ingvarsson PK, Aitken SN. Genetic architecture and genomic patterns of gene flow  
1115 between hybridizing species of *Picea*. *Heredity*. 2015;115:153–64.
- 1116 62. Lotterhos KE, Whitlock MC. Evaluation of demographic history and neutral parameterization on the  
1117 performance of  $F_{ST}$  outlier tests. *Mol Ecol*. 2014;23:2178–92.
- 1118 63. Lotterhos KE, Whitlock MC. The relative power of genome scans to detect local adaptation depends  
1119 on sampling design and statistical method. *Mol Ecol*. 2015;24:1031–46.
- 1120 64. Christians JK, Senger LK. Fine mapping dissects pleiotropic growth quantitative trait locus into linked  
1121 loci. *Mamm Genome*. 2007;18:240–5.
- 1122 65. Charlesworth B, Nordborg M, Charlesworth D. The effects of local selection, balanced polymorphism  
1123 and background selection on equilibrium patterns of genetic diversity in subdivided populations. *Genet*  
1124 *Res*. 1997;70:155–74.
- 1125 66. Charlesworth B. The effects of deleterious mutations on evolution at linked sites. *Genetics*.

- 1126 2012;190:5–22.
- 1127 67. Charlesworth B, Morgan MT, Charlesworth D. The effect of deleterious mutations on neutral molecular  
1128 variation. *Genetics*. 1993;134:1289–303.
- 1129 68. Hoban S, Kelley JL, Lotterhos KE, Antolin MF, Bradburd G, Lowry DB, et al. Finding the genomic  
1130 basis of local adaptation: pitfalls, practical solutions, and future directions. *Am Nat*. 2016;188:379–97.
- 1131 69. Klopstein S, Currat M, Excoffier L. The fate of mutations surfing on the wave of a range expansion.  
1132 *Mol Biol Evol*. 2006;23:482–90.
- 1133 70. Hofer T, Ray N, Wegmann D, Excoffier L. Large allele frequency differences between human  
1134 continental groups are more likely to have occurred by drift during range expansions than by selection.  
1135 *Ann Hum Genet*. 2009;73:95–108.
- 1136 71. Zhang B, Horvath S. A general framework for weighted gene co-expression network analysis. *Stat  
1137 Appl Genet Mol Biol*. 2005;4:Article17.
- 1138 72. Bella IE, Navratil S. Growth losses from winter drying (red belt damage) in lodgepole pine stands on  
1139 the east slopes of the Rockies in Alberta. *Can J For Res*. 1987;17:1289–92.
- 1140 73. Aitken SN, Whitlock MC. Assisted gene flow to facilitate local adaptation to climate change. *Annu Rev  
1141 Ecol Evol Syst*. 2013;44:367–88.
- 1142 74. Mbogga MS, Hamann A, Wang T. Historical and projected climate data for natural resource  
1143 management in western Canada. *Agric For Meteorol*. 2009;149:881–90.
- 1144 75. Hember RA, Kurz WA, Coops NC. Relationships between individual-tree mortality and water-balance  
1145 variables indicate positive trends in water stress-induced tree mortality across North America. *Glob  
1146 Chang Biol*. 2017;23:1691–710.
- 1147 76. Hember RA, Kurz WA, Coops NC. Increasing net ecosystem biomass production of Canada's boreal  
1148 and temperate forests despite decline in dry climates. *Global Biogeochem Cycles*.  
1149 2017;31:2016GB005459.
- 1150 77. Mahony CR, Cannon AJ, Wang T, Aitken SN. A closer look at novel climates: new methods and  
1151 insights at continental to landscape scales. *Glob Chang Biol*. 2017. doi:10.1111/gcb.13645.
- 1152 78. Yeaman S, Whitlock MC. The genetic architecture of adaptation under migration-selection balance.  
1153 *Evolution*. 2011;65:1897–911.
- 1154 79. Kremer A, Le Corre V. Decoupling of differentiation between traits and their underlying genes in  
1155 response to divergent selection. *Heredity*. 2012;108:375–85.
- 1156 80. Le Corre V, Kremer A. The genetic differentiation at quantitative trait loci under local adaptation. *Mol  
1157 Ecol*. 2012;21:1548–66.
- 1158 81. Flaxman SM, Feder JL, Nosil P. Genetic hitchhiking and the dynamic buildup of genomic divergence  
1159 during speciation with gene flow. *Evolution*. 2013;67:2577–91.
- 1160 82. Bürger R, Akerman A. The effects of linkage and gene flow on local adaptation: A two-locus  
1161 continent–island model. *Theor Popul Biol*. 2011;80:272–88.
- 1162 83. Wang T, Hamann A, Spittlehouse DL, Murdock TQ. ClimateWNA—high-resolution spatial climate data  
1163 for western North America. *J Appl Meteorol Climatol*. 2012;51:16–29.
- 1164 84. Daly C, Halbleib M, Smith JI, Gibson WP, Doggett MK, Taylor GH, et al. Physiographically sensitive

- 1165 mapping of climatological temperature and precipitation across the conterminous United States. *Int J*  
1166 *Climatol.* 2008;28:2031–64.
- 1167 85. Neale DB, Wegrzyn JL, Stevens KA, Zimin AV, Puiu D, Crepeau MW, et al. Decoding the massive  
1168 genome of loblolly pine using haploid DNA and novel assembly strategies. *Genome Biol.* 2014;15:R59.
- 1169 86. Li H, Durbin R. Fast and accurate short read alignment with Burrows-Wheeler transform.  
1170 *Bioinformatics.* 2009;25:1754–60.
- 1171 87. DePristo MA, Banks E, Poplin R, Garimella KV, Maguire JR, Hartl C, et al. A framework for variation  
1172 discovery and genotyping using next-generation DNA sequencing data. *Nat Genet.* 2011;43:491–8.
- 1173 88. Conesa A, Götz S. Blast2GO: A comprehensive suite for functional analysis in plant genomics. *Int J*  
1174 *Plant Genomics.* 2008;2008:619832.
- 1175 89. Alexa A, Rahnenführer J. Gene set enrichment analysis with topGO. 2009.  
1176 <https://bioconductor.riken.jp/packages/3.2/bioc/vignettes/topGO/inst/doc/topGO.pdf>. Accessed 1 Jan  
1177 2017.
- 1178 90. Blair LM, Granka JM, Feldman MW. On the stability of the Bayenv method in assessing human  
1179 SNP-environment associations. *Hum Genomics.* 2014;8:1.
- 1180 91. Csardi G, Nepusz T. The igraph software package for complex network research. *InterJournal,*  
1181 *Complex Systems.* 2006;1695:1–9.
- 1182 92. Margarido GRA, Souza AP, Garcia AAF. OneMap: software for genetic mapping in outcrossing  
1183 species. *Hereditas.* 2007;144:78–9.
- 1184 93. Pison G, Struyf A, Rousseeuw PJ. Displaying a clustering with CLUSPLOT. *Comput Stat Data Anal.*  
1185 1999;30:381–92.
- 1186 94. Kaufman L, Rousseeuw PJ. Finding groups in data: an introduction to cluster analysis. John Wiley &  
1187 Sons; 2009.
- 1188 95. Titterton DM. Algorithms for computing D-optimal design on finite design spaces. *Proceedings of*  
1189 *the 1976 Conference on Information Science and Systems.* 1976;:213–6.
- 1190 96. Hewitt G. The genetic legacy of the Quaternary ice ages. *Nature.* 2000;405:907–13.

## 1191 Tables

1192 Table 1. Overview of terminology used in the literature regarding pleiotropy and modularity.

| Term                 | References | Meaning                                                                                                                                                                                                                                                                                                                                      |
|----------------------|------------|----------------------------------------------------------------------------------------------------------------------------------------------------------------------------------------------------------------------------------------------------------------------------------------------------------------------------------------------|
| Genetic architecture | [1]        | Genetic architecture refers to the pattern of genetic effects that build and control a facet of the organism (character, trait, or fitness). A description of genetic architecture includes statements about gene and allele number, the distribution of allelic and mutation effects, patterns of pleiotropy, and recombination rates among |



|                                            |            |                                                                                                                                                                                                                                                                                                                                                                                                                                                                                                                       |
|--------------------------------------------|------------|-----------------------------------------------------------------------------------------------------------------------------------------------------------------------------------------------------------------------------------------------------------------------------------------------------------------------------------------------------------------------------------------------------------------------------------------------------------------------------------------------------------------------|
|                                            |            | causal loci on chromosomes.                                                                                                                                                                                                                                                                                                                                                                                                                                                                                           |
| Selectional pleiotropy                     | [8]        | The number of separate components of fitness a mutation effects. Traits are defined by the action of selection and not by the intrinsic attributes of the organism.                                                                                                                                                                                                                                                                                                                                                   |
| Antagonistic pleiotropy at a single locus  | [9]        | In the context of this study, an allele exhibits antagonistic pleiotropy if it has different effects on fitness at different extremes of an environmental variable (e.g., positive effects on fitness in cold environments and negative effects in warm environments), which results in an association between the allele frequency and the environmental variable                                                                                                                                                    |
| Environmental pleiotropy                   | This study | Genes affect fitness in multiple distinct aspects of the multivariate environment, where each aspect is defined by the action of selection                                                                                                                                                                                                                                                                                                                                                                            |
| Modularity or modular genetic architecture | [25]       | A modular unit is a complex of elements (characters or genes) that: 1) collectively serve a similar functional role, 2) are tightly integrated by strong pleiotropic effects of genetic variation, and 3) are relatively independent from other such units. Pleiotropic effects may be on traits or on fitness, and are limited to elements within a module, with a suppression of pleiotropic effects between different modules (Figure 1A, left column). Genes within a module may or may not be physically linked. |
| Co-association network analysis            | This study | An application of network theory used to identify modules of loci that are similar in their associations across many variables.                                                                                                                                                                                                                                                                                                                                                                                       |
| Co-association module                      | This study | A group of SNPs that show associations with a distinct <i>environmental factor</i> . These modules can be thought of as “variational” modules [sensu 19], which are composed of features that vary together and are relatively independent of other such sets of features. In practice, co-association modules are inferred by their similarity in associations with multiple environmental variables.                                                                                                                |
| Selective environmental factors            | This study | The specific aspect of the multivariate environment to which a SNP adapts on a geographic landscape. In practice, these are inferred by the environmental variables that associate with candidate SNPs within co-association modules.                                                                                                                                                                                                                                                                                 |

1267 Table 2. Environmental variables measured for each sampling location, ordered by their  
 1268 abbreviations shown in Figure 2 A and B.

| Abbreviation | Definition                                      | Category            |
|--------------|-------------------------------------------------|---------------------|
| MSP          | May to September precipitation (mm)             | Aridity             |
| LONG         | Longitude                                       | Geography           |
| bFPP         | Day of the year frost-free period begins        | Freezing            |
| ELEVATION    | Elevation                                       | Geography           |
| LAT          | Latitude                                        | Geography           |
| TD           | Temperature difference (MWMT-MCMT) (°C)         | Freezing or Aridity |
| DD_0         | Degree-days below 0°C                           | Freezing            |
| PAS          | Precipitation as snow (mm)                      | Aridity or Freezing |
| MAP          | Mean annual precipitation (mm)                  | Aridity             |
| CMD          | Hargreaves climate-moisture deficit             | Aridity             |
| SHM          | Summer heat-moisture index ((MWMT)/(MSP/1000))  | Aridity             |
| AHM          | Annual heat-moisture index (MAT+10)/(MAP/1000)) | Aridity             |
| MWMT         | Mean warmest month temperature (°C)             | Aridity             |
| DD5          | Degree-days above 5°C                           | Aridity             |
| Eref         | Hargreaves reference evaporation                | Aridity             |
| EXT          | Extreme maximum temperature over 30 years (°C)  | Aridity             |



|      |                                                |                     |
|------|------------------------------------------------|---------------------|
| MCMT | Mean coldest month temperature (°C)            | Freezing            |
| EMT  | Extreme minimum temperature over 30 years (°C) | Freezing            |
| MAT  | Mean annual temperature (°C)                   | Aridity or Freezing |
| eFFP | Day of the year frost-free period ends         | Freezing            |
| NFFD | Number of days without frost                   | Freezing            |
| FFP  | Frost-free period (bFFP-eFFP)                  | Freezing            |

## 1350 Figure Legends

### 1351 **Figure 1. Conceptual framework for evaluating the modularity and pleiotropy of genetic** 1352 **architectures adapting to the environment.**

1353 In this example, each gene (identified by numbers) contains two causal SNPs (identified by  
1354 letters) where mutations affect fitness in potentially different aspects of the environment. The  
1355 two aspects of the environment that affect fitness are aridity and freezing. A) The true underlying  
1356 genetic architecture adapting to multiple aspects of climate. The left column represents a  
1357 modular genetic architecture in which any pleiotropic effects of genes are limited to a particular  
1358 aspect of the environment. The right column represents a non-modular architecture, in which  
1359 genes have pleiotropic effects on multiple aspects of the environment. Universal pleiotropy  
1360 occurs when a gene has effects on all the multiple distinct aspects of the environment. Genes in  
1361 this example are unlinked in the genome, but linkage among genes is an important aspect of the  
1362 environmental response architecture. B) Hierarchical clustering is used to identify the  
1363 “co-association modules,” which jointly describe the groups of loci that adapt to a distinct  
1364 aspects of climate as well as the distinct aspects of climate to which they adapt. In the left  
1365 column, the “aridity module” is a group of SNPs within two unlinked genes adapting to aridity,  
1366 and SNPs within these genes show associations with both temperature and climate-moisture  
1367 deficit. In the right column, note how the aridity module is composed of SNPs from all 4 unlinked  
1368 genes. C) Co-association networks are used to visualize the results of the hierarchical clustering  
1369 with regards to the environment, and connections are based on similarity in SNPs in their  
1370 associations with environments. In both columns, all SNPs within a module (network) all have  
1371 similar associations with multiple environmental variables. D) Pleiotropy barplots are used to  
1372 visualize the results of the hierarchical clustering with regards to the genetic architecture,

1373 represented by the proportion of SNPs in each candidate gene that affects different aspects of  
1374 the environment (as defined by the co-association module).

1375 **Figure 2. Co-association modules for *Pinus contorta*.**

1376 A) Correlations among environments measured by Spearman's  $\rho$ . Abbreviations of the  
1377 environmental variables can be found in Table 2. B) Hierarchical clustering of associations  
1378 between allele frequencies (of SNPs in columns) and environments (in rows) measured by  
1379 Spearman's  $\rho$ . C-F) Each co-association network represents a distinct co-association module,  
1380 with color schemes according to the four major groups in the data. Each node is a SNP and is  
1381 labeled with a number according to its exome contig, and a color according to its module - with  
1382 the exceptions that modules containing a single SNP all give the same color within a major  
1383 group. Numbers next to each module indicate the number of distinct genes involved (with the  
1384 exception of the Geography group, where only modules with 5 or more genes are labeled). G)  
1385 The pleiotropy barplot, where each bar corresponds to a contig, and the colors represent the  
1386 proportion of SNPs in each co-association module. Note that contig IDs are ordered by their  
1387 co-association module, and the color of contig-IDs along the x-axis is determined by the  
1388 co-association module that the majority of SNPs in that contig cluster with. Contigs previously  
1389 identified as undergoing convergent evolution with spruce by Yeaman et al. 2016 are indicated  
1390 with "\*". Abbreviations: "Temp": temperature, "Precip": precipitation, "freq": frequency.

1391 **Figure 3. Comparison of linkage disequilibrium (lower diagonal) and recombination rates**  
1392 **(upper diagonal) for exome contigs.**

1393 Only contigs with SNPs in the mapping panel are shown. Rows and column labels correspond  
1394 to Figure 2G. Darker areas represent either high physical linkage (low recombination) or high  
1395 linkage disequilibrium.

1396 **Figure 4. Overview of galaxy biplots.**

1397 The association between allele frequency and one variable is plotted against the association  
1398 between allele frequency and a second variable. The Spearman's  $\rho$  correlation between the two  
1399 variables (mean annual temperature or MAT and mean annual precipitation or MAP in this  
1400 example) is shown in the lower right corner. When the two variables are correlated,  
1401 genome-wide covariance is expected to occur in the direction of their association (shown with  
1402 quadrant shading in light grey). The observed genome-wide distribution of allelic effects is  
1403 plotted in dark grey and the 95% prediction ellipse is plotted as a black line. Because derived  
1404 alleles were coded as 1 and ancestral alleles were coded as 0, the location of any particular  
1405 SNP in bivariate space represents the type of environment that the derived allele is found in  
1406 higher frequency, whereas the location of the ancestral allele would be a reflection through the  
1407 origin (note only derived alleles are plotted).

1408 **Figure 5. Galaxy biplots for different environmental variables for regular (left column) and**  
1409 **structure-corrected (right column) associations.**

1410 Top candidate SNPs are highlighted against the genome-wide background. The internal color of  
1411 each point corresponds to its co-association module (as shown in Figure 2 C-F). Top row: mean  
1412 annual temperature (MAT) vs. mean annual precipitation (MAP), middle row: MAT and  
1413 Elevation, bottom row: MAT and latitude (LAT).

1414 **Figure 6. Pie charts representing the frequency of derived candidate alleles across the**  
1415 **landscape.**

1416 Allele frequency pie charts are overlain on top of an environment that the SNP shows significant  
1417 associations with. The mean environment for each population is shown by the color of the  
1418 outline around the pie chart. A) Allele frequency pattern for a SNP from contig 1 in the Multi  
1419 cluster from Figure 2. The derived allele had negative associations with temperature but positive  
1420 associations with latitude. B) Allele frequency pattern for a SNP from contig 8 in the Aridity  
1421 cluster. The derived allele had negative associations with annual:heat moisture index (and other  
1422 measures of aridity) and positive associations with latitude. SNPs were chosen as those with  
1423 the highest degree in their co-association module.

1424 **Figure 7. Co-association modules mapped to co-expression clusters determined by**  
1425 **climate treatments.**

1426 Contig ID, color, and order shown on the bottom correspond to co-association modules plotted  
1427 in Figure 2. Co-expression clusters from [55] are shown at the top.

1428 **Figure 8. Comparison of co-association networks resulting from simulated data for 3 de-**  
1429 **mographies.**

1430 A) Isolation by distance (IBD), B) range expansion from a single refuge (1R), and C) range  
1431 expansion from two refugia (2R). All SNPs were simulated unlinked and 1% of SNPs were  
1432 simulated under selection to an unmeasured weak latitudinal cline. Boxplots of degree of  
1433 connectedness of a SNP as a function of its strength of selection, across all replicate  
1434 simulations (top row). Examples of networks formed by datasets that were neutral-only (middle  
1435 row) or neutral+selected (bottom row) outlier loci.



## 1436 Supplementary Tables

### 1437 **Table S1. Results from GO analysis for all top candidate genes and for each group.**

1438 The top 5 processes are shown for each category. “P” represents the *P*-value from parent-child  
1439 Fisher test, while “fdr” represents significance after correction for false discovery rate.

### 1440 **Table S2. Top candidate genes and their annotations.**

1441 For each gene the following information is indicated: the co-association module ID  
1442 (“group\_subMod”), the number of outlier SNPs in each of the four major groups (“Multi”,  
1443 “Aridity”, “Freezing”, or “Geography”), the Gene ID used in the main paper (“NewContigIDMod”),  
1444 the color used for plotting (“module\_col”), whether or not its homolog shows convergent signals  
1445 of adaptation with spruce (“is.covergent”), TAIR ID (“tair”), putative gene function  
1446 (“Annotations”), whether or not the gene was differentially expressed (“diffExp”), and the  
1447 co-expression cluster (“coexCluster”).

## 1448 Supplementary Figures

1449 Figure S1. Histogram of  $X^T X$  estimated from Bayenv2 for all SNPs (top) and for top candidate  
1450 SNPs (bottom).

1451 Figure S2. Undirected graph network for the Multi group (enlarged version of Figure 2C).

1452 Figure S3. Undirected graph network for the Aridity group (enlarged version of Figure 2D).

1453 Figure S4. Undirected graph network for the Freezing group (enlarged version of Figure 2E).

1454 Figure S5. Undirected graph network for the Geography group (enlarged version of Figure 2F).

1455 Figure S6. Heatmap of structure-corrected allele associations with the environment, analogous  
1456 to Figure 2B in the main paper. Note that although the pattern is very similar, the magnitude of  
1457 allele correlations is smaller in the structure-corrected data.

1458 Figure S7. Linkage disequilibrium heatmap. Mean correlation among allele frequencies between  
1459 top candidate genes. Genes are ordered the same as Figure 2G in the main paper.

1460 Figure S8. Recombination heatmap, clustered by recombination rates. The same data as is  
1461 shown in Figure 3, except re-clustered by recombination rates to more easily see the patterns of  
1462 physical linkage.

1463 Figure S9. Loadings of environments onto PC axes. The length and direction of each vector  
1464 represents the scaled loading of that environmental variable onto the PC axis. The color of each  
1465 vector represents the mean proportion of variance explained by that environment in the two  
1466 axes plotted.



1467 Figure S10. Outliers on PC axes. The distribution of log-10 Bayes Factors for the association  
1468 between a SNP and a PC axis. Each point is a SNP colored according to its co-association  
1469 module in Figure 2C-F. Vertical and horizontal lines represent criteria for significance, and the  
1470 black ovals represent the 95% prediction ellipse. Note that candidate SNPs all had  $BF > 2$  with  
1471 at least one univariate environmental variable.

1472 Figure S11. SNP annotations and genomic features. Proportion of exome SNPs falling into  
1473 various categories for genomic features compared to in the top candidate list. 3primeFLANK: 3'  
1474 flanking region; 3primeUTR: 3' untranslated region; 5primeFLANK: 5' flanking region;  
1475 5primeUTR: 5' untranslated region; non-tcontig: not located in a transcriptomic contig  
1476 (intergenic); nonsyn: non-synonymous substitution; unk-adj: unknown adjacent region;  
1477 unk-flank: unknown flanking region; UNKNOWN-ORF: unknown open reading frame.

1478 Figure S12. Error rates from the simulations given a less stringent criteria (Bonferroni, left) and  
1479 a more stringent criteria (Bonferroni and Bayes Factors from bayenv2, right). The less stringent  
1480 criteria was used for the simulations because it had some false positives (A), while the more  
1481 stringent criteria was used for the empirical data because it didn't have any false positives (B).  
1482 The three demographies are isolation by distance (IBD), range expansion from one refuge (1R),  
1483 and range expansion from two refugia (2R). While using the more stringent criteria resulted in  
1484 no false positives, it also reduced the number of true positives (compare C and D), with the  
1485 most severe reduction under isolation by distance.

1486 Figure S13. Pairwise distances among loci as a function of selection for simulated data.  
1487 Evaluation of 0.1 as a distance threshold for creating an co-association module. The three  
1488 demographies are isolation by distance (IBD), range expansion from one refuge (1R), and range  
1489 expansion from two refugia (2R). For the simulated data, top candidates were chosen as

1490 described in the methods. Multivariate euclidean distance was calculated among the loci based  
1491 on their associations with environments, and the proportion of pairwise distances above the  
1492 distance threshold of 0.1 (used for the empirical data) was calculated for each type of  
1493 comparison. We evaluated four types of pairwise comparisons: neutral loci with each other  
1494 ("Neut-Neut"), neutral loci with selected loci ("Neut-Sel"), all selected loci with each other  
1495 ("Sel-Sel"), and only loci under strong selection with each other ( $s > 0.1$ , "strongSel-strongSel").  
1496 A higher proportion of pairwise distances above the threshold indicates that these loci would be  
1497 more connected to each other in the co-association network.

1498 Figure S14. More examples of networks from simulations. The simulated datasets were nested  
1499 within randomly generated selective environments, such that different demographic histories  
1500 were simulated on the same environmental landscape. For this randomly generated  
1501 environment, loci simulated under stronger selection had a propensity to cluster differently than  
1502 loci simulated under weaker selection. To be clear, they still show the same patterns of  
1503 associations, but the absolute value of the associations was just larger for the loci under strong  
1504 selection and this caused the creation of a second cluster.

## Figures

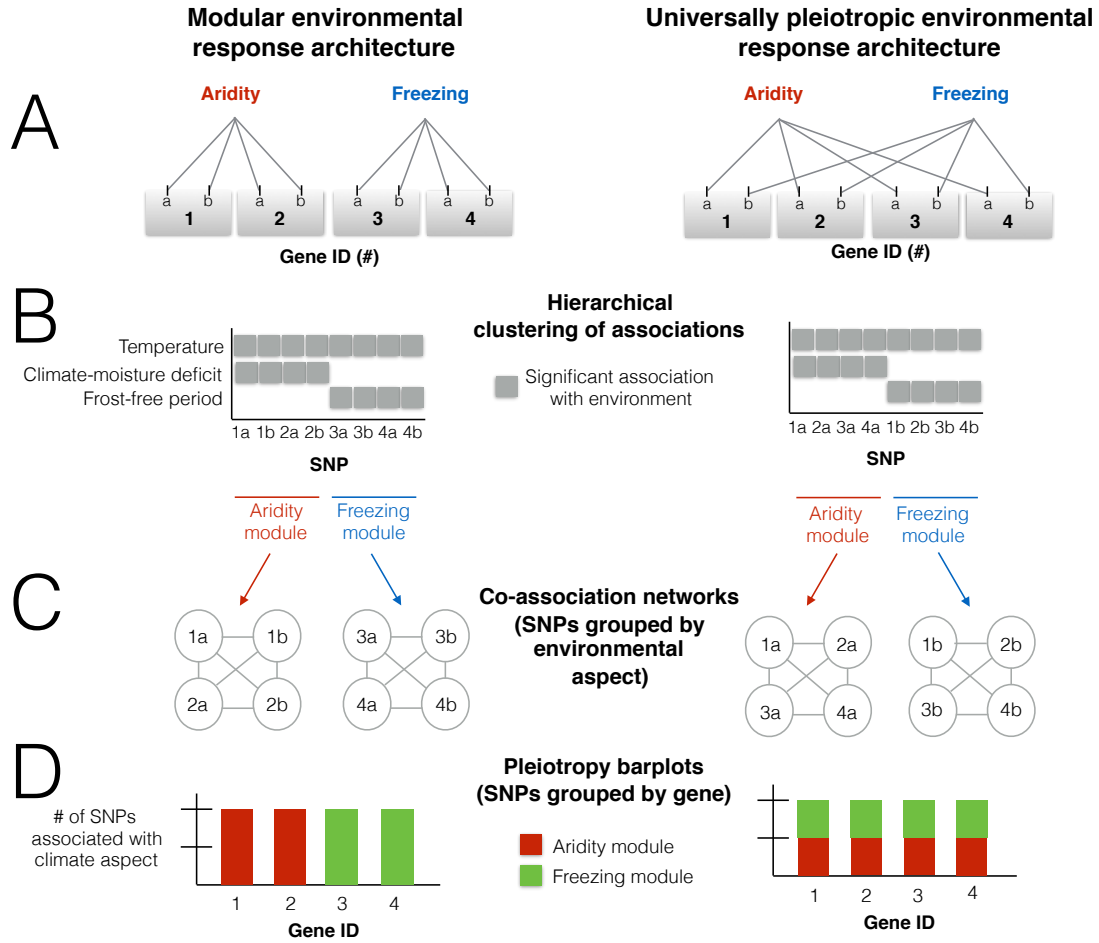

FIGURE 1.

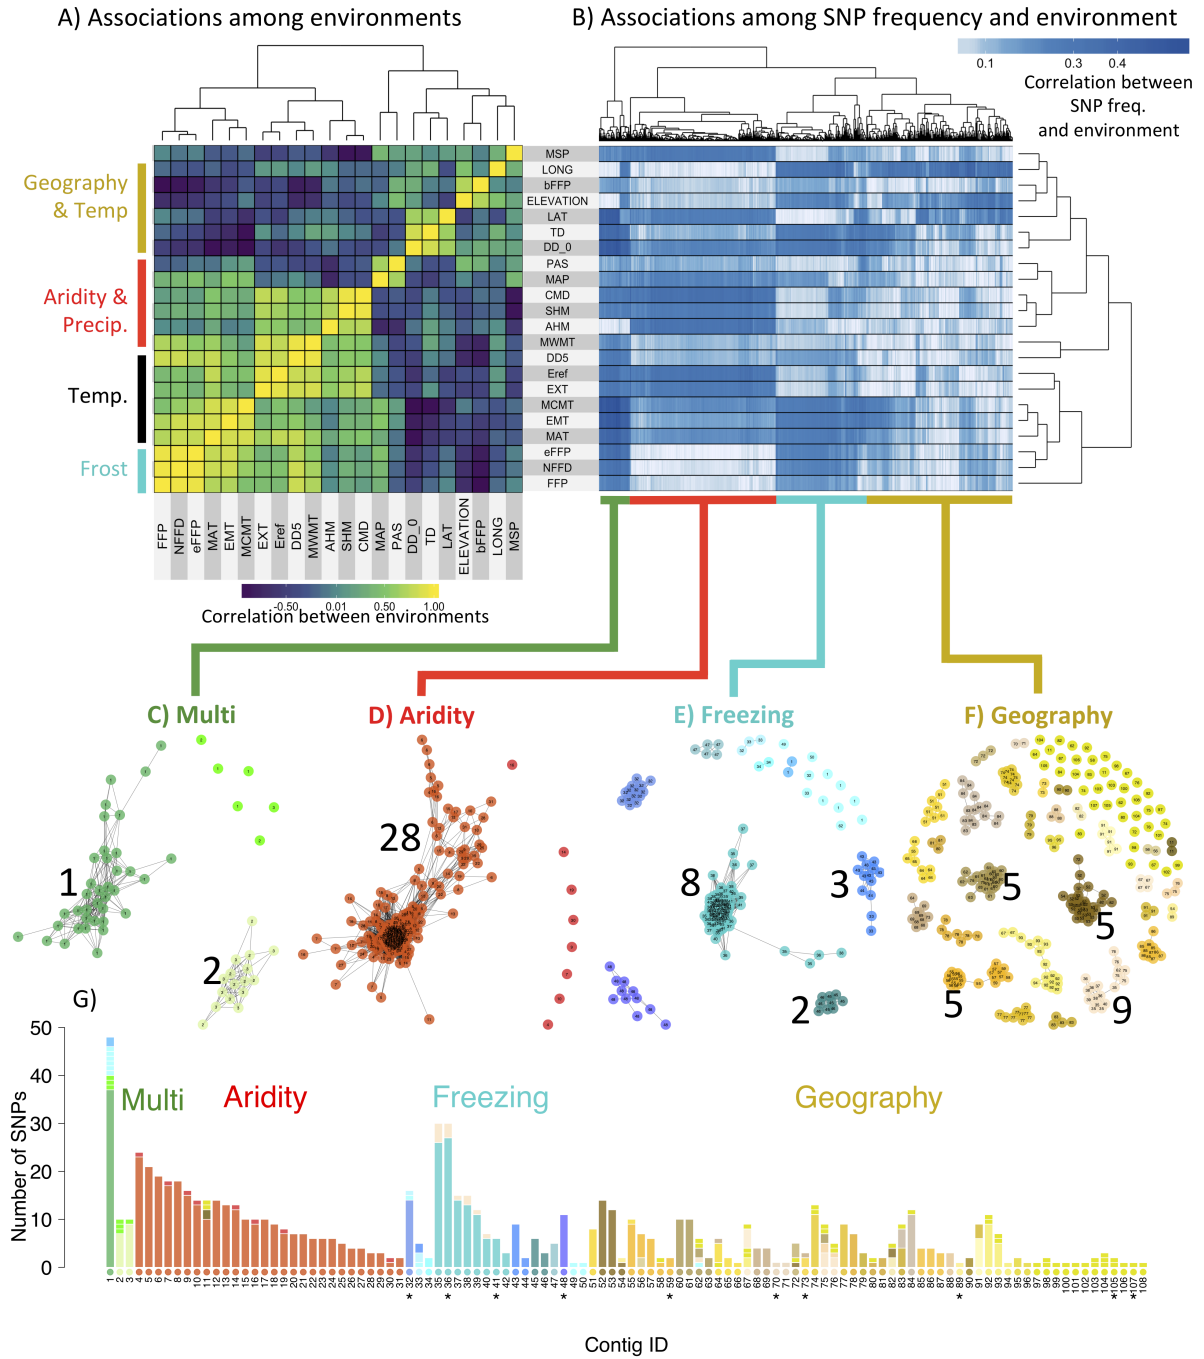

FIGURE 2

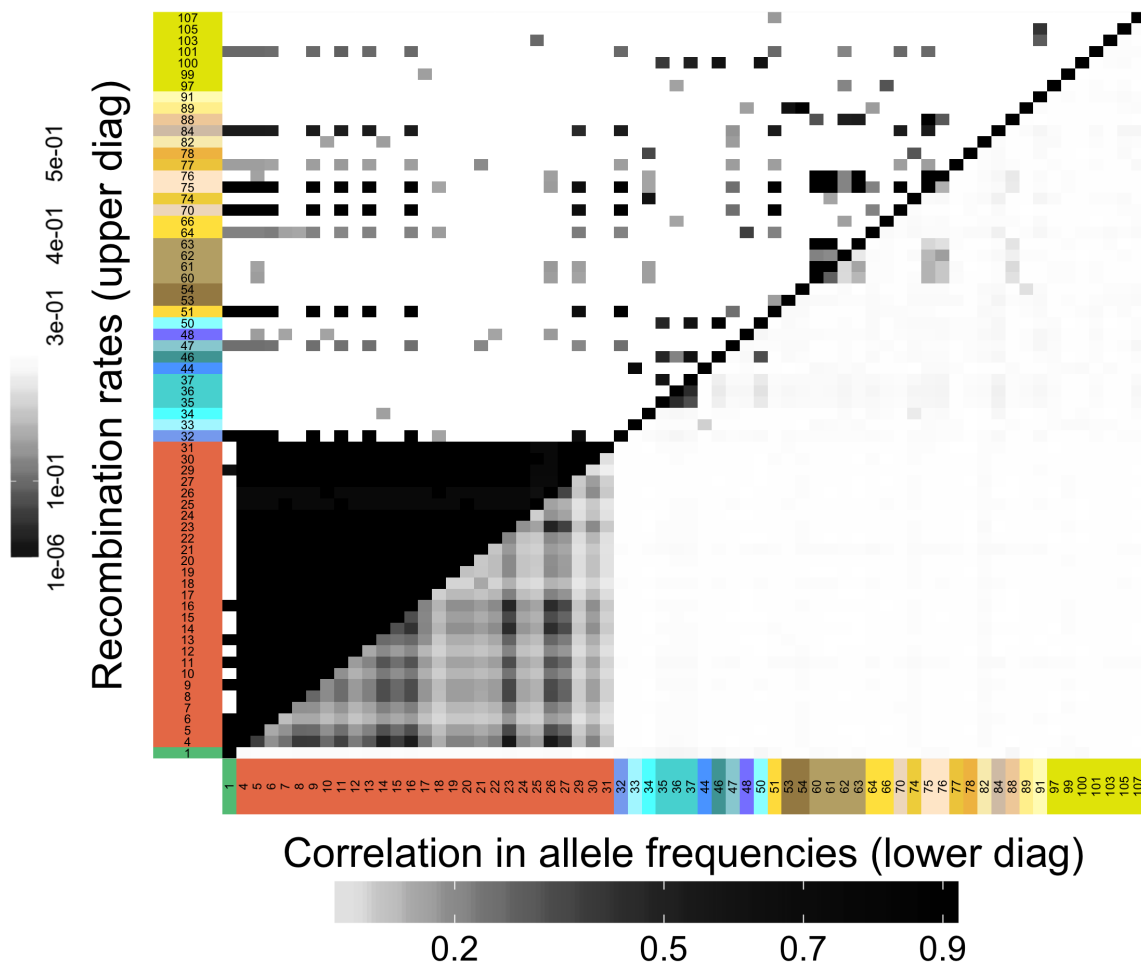

FIGURE 3

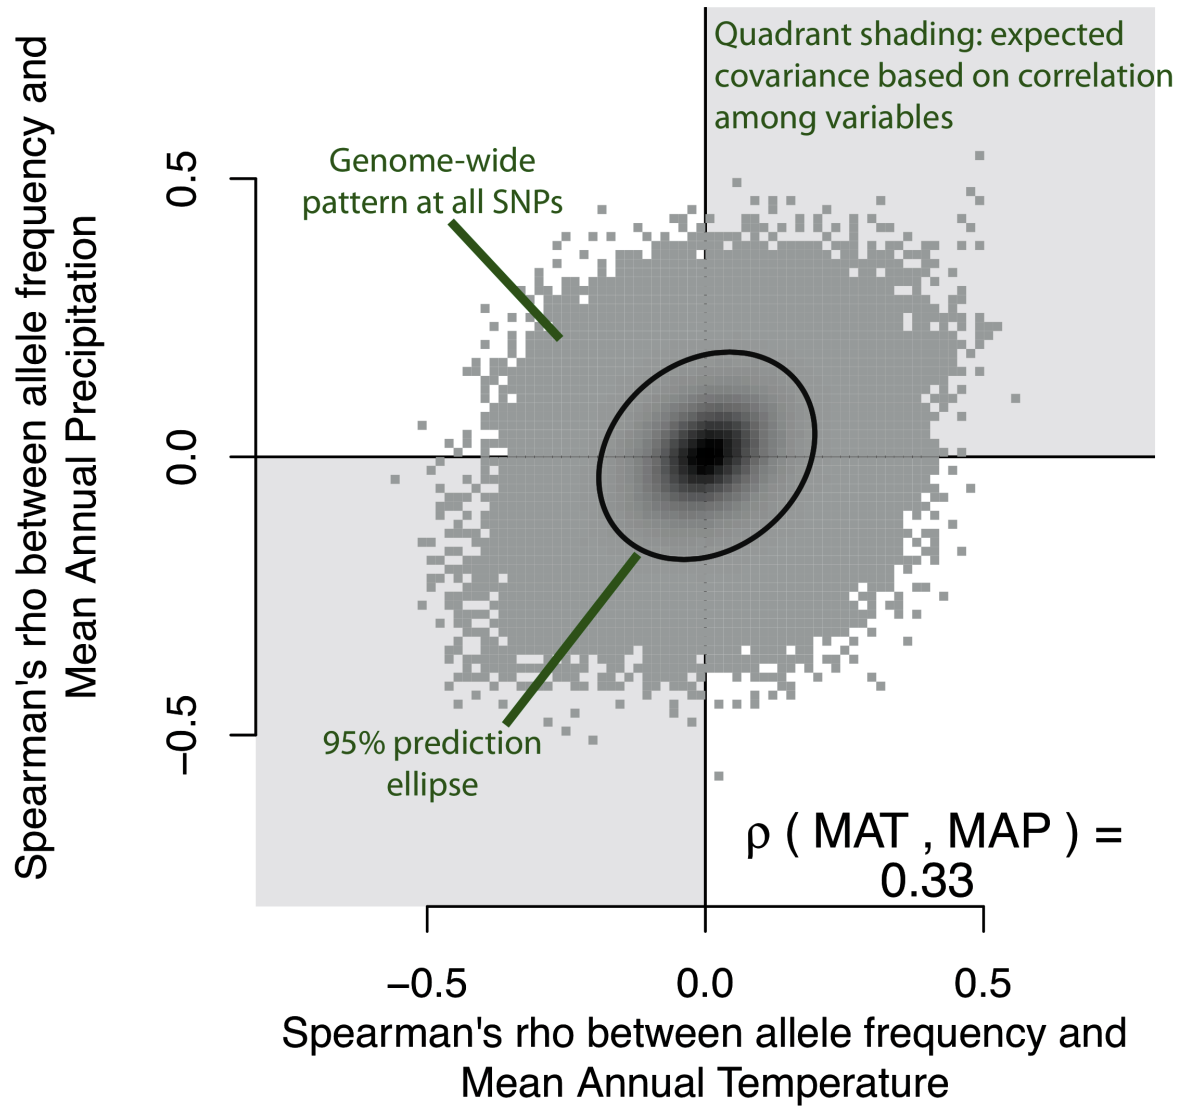

FIGURE 4

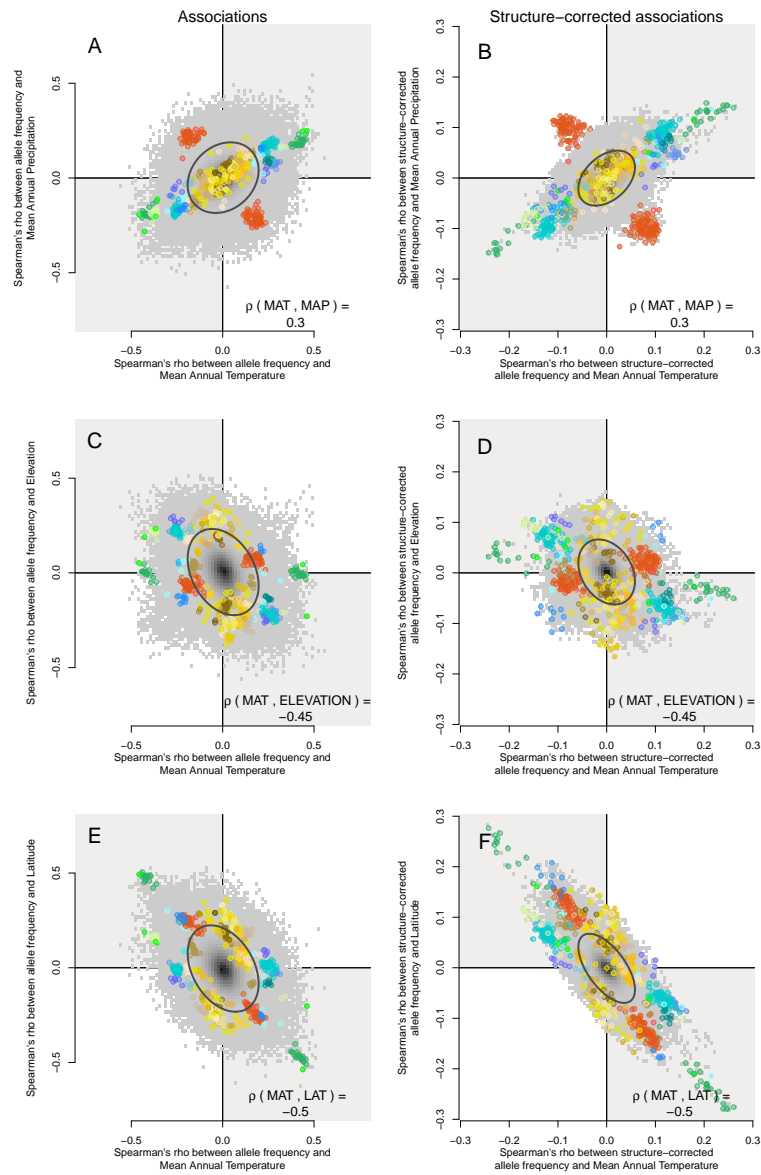

FIGURE 5

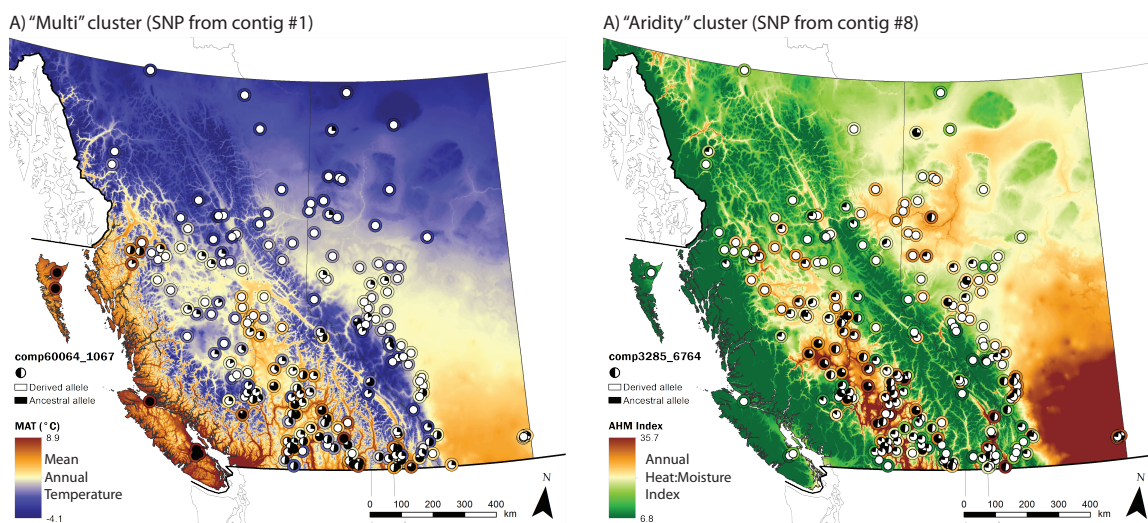

FIGURE 6



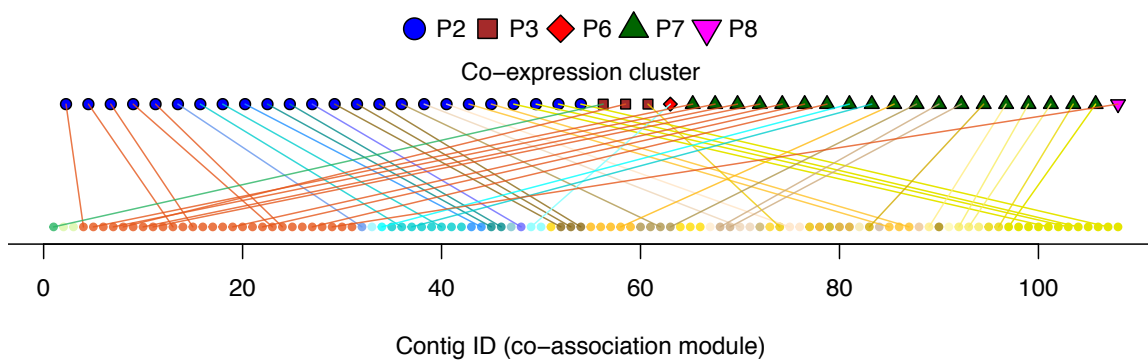

FIGURE 7

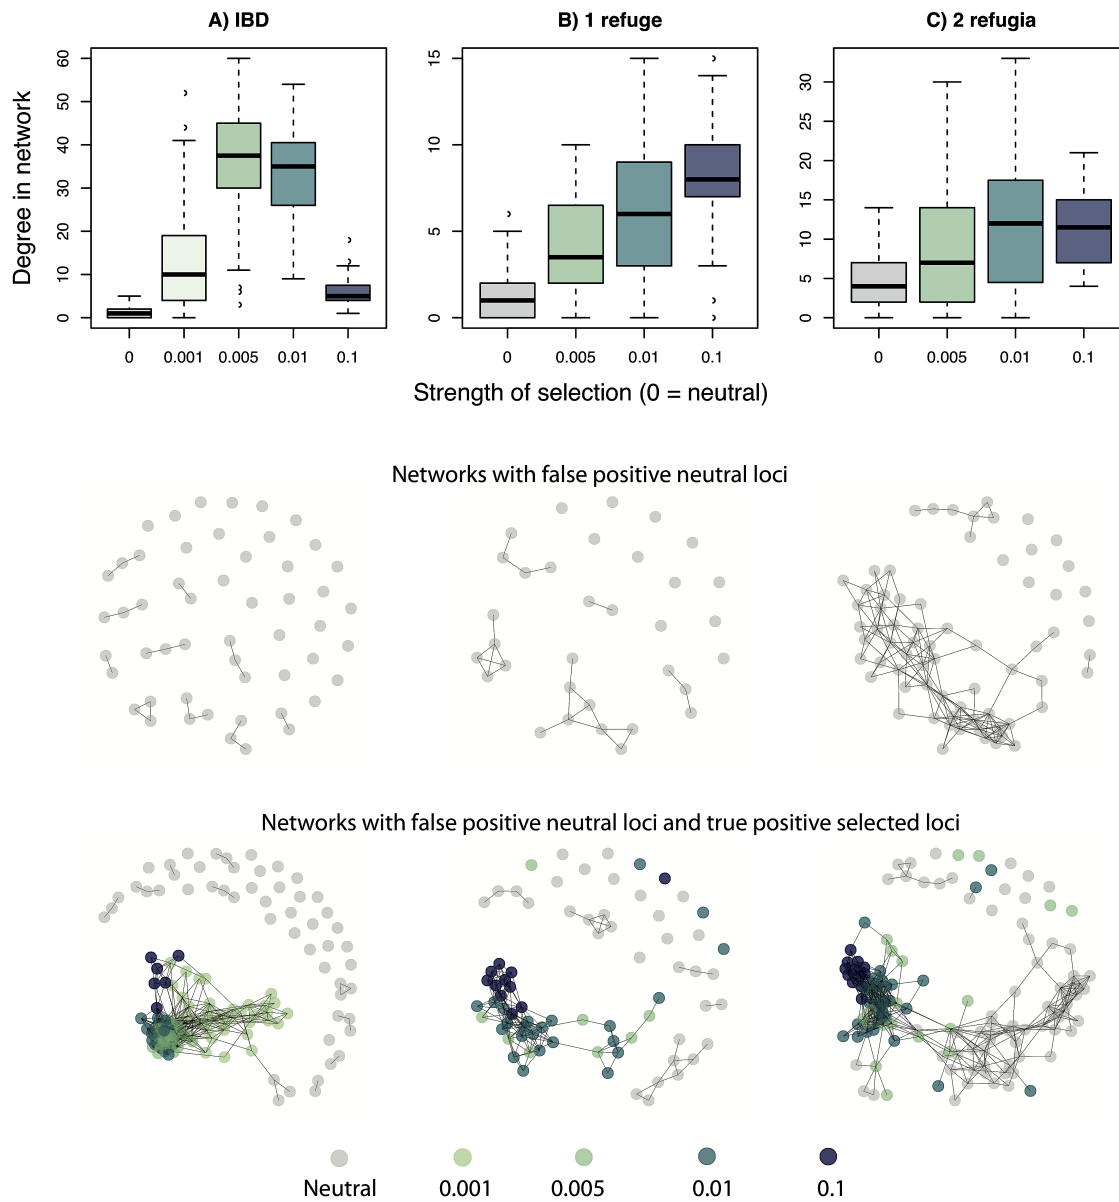

FIGURE 8
